1 **Epistasis detection and modeling for genomic selection in cowpea (*Vigna unguiculata*. L.**  
2 **Walp.)**

3  
4

5 Marcus O. Olatoye<sup>1</sup>, Zhenbin Hu<sup>2</sup>, and Peter O. Aikpokpodion\*<sup>3</sup>

6 <sup>1</sup>Dept. of Crop Sciences, University of Illinois, Urbana-Champaign, IL, <sup>2</sup>Dept. of Agronomy,  
7 Kansas State University, Manhattan, KS. <sup>3</sup>Department of Genetics and Biotechnology,  
8 University of Calabar, Nigeria

9

10 Corresponding Author: Peter O. Aikpokpodion

11 Address: Department of Genetics and Biotechnology, University of Calabar, Nigeria

12 Email: [paikpokpodion@unical.edu.ng](mailto:paikpokpodion@unical.edu.ng); [paikpokpodion@gmail.com](mailto:paikpokpodion@gmail.com)

13 ORCID iD: 0000-0002-4553-8299

14

15 **Abstract**

16 Genetic architecture reflects the pattern of effects and interaction of genes underling  
17 phenotypic variation. Most mapping and breeding approaches generally consider the additive  
18 part of variation but offer limited knowledge on the benefits of epistasis which explains in  
19 part the variation observed in traits. In this study, the cowpea multiparent advanced  
20 generation inter-cross (MAGIC) population was used to characterize the epistatic genetic  
21 architecture of flowering time, maturity, and seed size. In addition, considerations for  
22 epistatic genetic architecture in genomic-enabled breeding (GEB) was investigated using  
23 parametric, semi-parametric, and non-parametric genomic selection (GS) models. Our results  
24 showed that large and moderate effect sized two-way epistatic interactions underlie the traits  
25 examined. Flowering time QTL colocalized with cowpea putative orthologs of *Arabidopsis*  
26 *thaliana* and *Glycine max* genes like *PHYTOCLOCK1* (*PCL1* [Vigun11g157600]) and  
27 *PHYTOCHROME A* (*PHY A* [Vigun01g205500]). Flowering time adaptation to long and  
28 short photoperiod was found to be controlled by distinct and common main and epistatic loci.  
29 Parametric and semi-parametric GS models outperformed non-parametric GS model. Using  
30 known QTL as fixed effects in GS models improved prediction accuracy when traits were  
31 controlled by both large and moderate effect QTL. In general, our study demonstrated that  
32 prior understanding the genetic architecture of a trait can help make informed decisions in  
33 GEB. This is the first report to characterize epistasis and provide insights into the  
34 underpinnings of GS versus marker assisted selection in cowpea.

35

36 Keywords: Cowpea, Genetic architecture, Epistasis, QTL, Genomic-enabled breeding,  
37 Genomic selection, flowering time, and photoperiod.

## 38 Introduction

39 Asymmetric transgressive variation in quantitative traits is usually controlled by non-  
40 additive gene action known as epistasis (Rieseberg, Archer and Wayne, 1999). Epistasis has  
41 been defined as the interaction of alleles at multiple loci (Mathew *et al.*, 2018). The joint  
42 effect of the alleles at these loci may be lower or higher than the total effects of these loci  
43 (Johnson, 2008). In selfing species, epistasis is common due to high level of homozygosity  
44 (Volis *et al.*, 2010) and epistatic interactions have been found among loci underlying  
45 flowering time in barley (Mathew *et al.*, 2018), rice (Chen *et al.*, 2015; M. Chen *et al.*, 2018),  
46 and sorghum (Li *et al.*, 2018). However, the direct quantification of the importance of  
47 epistasis for breeding purposes has not been fully realized due to the fact that most of the  
48 current statistical models cannot efficiently characterize or account for epistasis (Mackay,  
49 2001; Moore and Williams, 2009; Sun, Ma and Mumm, 2012; Mathew *et al.*, 2018).  
50 Common quantitative traits mapping approaches are often single-locus analysis techniques.  
51 These techniques focus on the additive contribution of genomic loci (H. Barton and  
52 D. Keightley, 2002) which may explain a fraction of the genetic variation; thus leading to  
53 missing heritability.

54 Regardless of the limitations of genomic mapping approaches, characterization of the  
55 genetic basis of complex agronomic traits has been beneficial for breeding purposes. For  
56 example, markers tagging quantitative trait loci (QTL) have been used in marker-assisted  
57 selection (MAS) in breeding programs (Zhang *et al.* 2003; Pan *et al.* 2006; Saghai Maroof *et al.*  
58 *al.* 2008; Foolad and Panthee 2012; Massman *et al.* 2013; Mohamed *et al.* 2014; Zhao *et al.*  
59 2014). However, the efficiency of QTL based MAS approach in breeding is limited. First, the  
60 small sample size of bi-parental populations where QTL are detected often result in  
61 overestimation of the respective QTL effect sizes; a phenomenon known as Beavis effect  
62 (Utz, Melchinger and Schön, 2000; Xu, 2003; King and Long, 2017). Second, genetic  
63 diversity is limited to the two parents forming the bi-parental population, thus QTL may not  
64 reflect the entire variation responsible for the trait and may not be transferable to other  
65 genetic backgrounds (Xu *et al.*, 2017). Third, linkage mapping is limited in power to detect  
66 small effect loci, thus only the available large effects loci are used for MAS (Ben-Ari and  
67 Lavi 2012). Notably, MAS is more efficient with traits controlled by few genomic loci and  
68 not polygenic traits (Bernardo, 2008). In contrast, genomic selection (GS) that employs  
69 genome wide markers has been found to be more suited for complex traits, and also having  
70 higher response to selection than MAS (Bernardo and Yu, 2007; Wong and Bernardo, 2008;  
71 Cerrudo *et al.*, 2018).

72 In GS, a set of genotyped and phenotyped individuals are first used to train a model  
73 that estimates the genomic estimated breeding values (GEBVs) of un-phenotyped but  
74 genotyped individuals (Jannink, Lorenz and Iwata, 2010). GS models often vary in  
75 performance with the genetic architecture of traits. Parametric GS models are known to  
76 capture additive genetic effects but not efficient with epistatic effects due to the  
77 computational burden of high-order interactions (Moore and Williams, 2009; Howard,  
78 Carriquiry and Beavis, 2014). Parametric GS models with incorporated kernels (marker based  
79 relationship matrix) for epistasis have recently been developed (Covarrubias-pazaran, 2017).  
80 Semi-parametric and non-parametric GS models capturing epistatic interactions have been  
81 developed and implemented in plant breeding (Gianola, Fernando and Stella, 2006; Gianola  
82 and de los Campos, 2008; De Los Campos *et al.*, 2010). Semi-parametric models as  
83 Reproducing Kernel Hilbert Space (RKHS) reduces parametric space dimensions to  
84 efficiently capture epistatic interactions among markers (Jiang and Reif, 2015; de Oliveira  
85 Couto *et al.*, 2017). Using simulated data, Howard *et al.* 2014 showed that semi-parametric  
86 and non-parametric GS models can improve prediction accuracies under epistatic genetic  
87 architectures. In general, GS has been widely studied in and applied to major crop species  
88 including both cereals and legumes. However, in orphan crop species, applications of  
89 genomic-enabled breeding (GEB) methods is still limited (Varshney *et al.*, 2012).

90 Cowpea (*Vigna unguiculata* L. Walp) is a widely adapted warm-season orphan  
91 herbaceous leguminous annual crop and an important source of protein in developing  
92 countries (Muchero *et al.*, 2009; Varshney *et al.*, 2012; Boukar *et al.*, 2018; Huynh *et al.*,  
93 2018). Cowpea is cultivated over 12.5 million hectares in tropical and sub-tropical zones of  
94 the world including Sub-Saharan Africa, Asia, South America, Central America, the  
95 Caribbean, United States of America and around the Mediterranean Sea. However, more than  
96 95 *per cent* of cultivation takes place in Sub-Saharan Africa (Boukar *et al.*, 2018). It is the  
97 most economically important African leguminous crop and of vital importance to the  
98 livelihood of several millions of people. Due to its flexibility as a “hungry season crop”  
99 (Langyintuo *et al.*, 2003), cowpea is part of the rural families’ coping strategies to mitigate  
100 the effect of changing climatic conditions.

101 Cowpea’s nitrogen fixing and drought tolerance capabilities make it a valuable crop  
102 for low-input and smallholder farming systems (Hall *et al.*, 2003; Boukar *et al.*, 2018).  
103 Breeding efforts using classical approaches have been made to improve cowpea’s tolerance  
104 to both biotic (disease and pest) and abiotic (drought and heat) stressors (Hall *et al.*, 2003;  
105 Hall, 2004). Advances in applications of next generation sequencing (NGS) and development

106 of genomic resources (consensus map, draft genome, and multiparent population) in cowpea  
107 have provided the opportunity for the exploration for GEB (Muchero *et al.*, 2009; Boukar *et*  
108 *al.*, 2018; Huynh *et al.*, 2018). MAS and GS have improved genetic gain in soybean (*Glycine*  
109 *max*) (Jarquin, Specht and Lorenz, 2016; Kurek, 2018; Matei *et al.*, 2018) and common bean  
110 (*Phaseolus vulgaris*) (Schneider, Brothers and Kelly, 1997; Yu, Park and Poysa, 2000; Wen  
111 *et al.*, 2019). However, cowpea still lags behind major legumes in the area of GEB  
112 applications. GEB has the potential of enabling expedited cowpea breeding to ensure food  
113 security in developing countries where national breeding programs still depend on labor-  
114 intensive and time-consuming classical breeding approaches.

115 In this study, the cowpea multiparent advanced generation inter-cross (MAGIC)  
116 population was used to explore MAS and GS. The cowpea MAGIC population was derived  
117 from intercrossing among eight founder lines (Huynh *et al.*, 2018) and offers greater genetic  
118 diversity than bi-parentals to identify higher-order epistatic interactions (Mathew *et al.*,  
119 2018). Although, theoretical models and empirical studies involving simulations have  
120 suggested the significant role for epistasis in breeding (Melchinger *et al.*, 2007; Volis *et al.*,  
121 2010; Messina *et al.*, 2011; Howard, Carriquiry and Beavis, 2014); empirical evidence from  
122 practical breeding are limited. Therefore, the epistatic genetic architecture of three traits in  
123 cowpea was evaluated alongside its considerations in genomic enabled breeding using  
124 parametric, semi-parametric, and non-parametric GS models.

## 125 **Materials and Methods**

### 126 **Plant genetic resource and phenotypic evaluation**

127 This study was performed using publicly available cowpea MAGIC population's  
128 phenotypic and genotypic data (Huynh *et al.*, 2018). The MAGIC population was derived  
129 from intercross between eight founders. The F<sub>1</sub>s were derived from eight-way intercross  
130 between the founders and were subsequently selfed through single seed descent for eight  
131 generations. The F<sub>8</sub> RILs were later genotyped with 51,128 SNPs using the Illumina Cowpea  
132 Consortium Array. A core set of 305 MAGIC RILs were selected and phenotyped (Huynh *et*  
133 *al.*, 2018). The RILs were evaluated under two irrigation regimes.

134 In this study, the flowering time (FLT), maturity (MAT), and seed size (SS) data were  
135 analyzed for environment-by-environment correlations and best linear unbiased predictions  
136 (BLUPs). The traits analyzed in this study are; FTFILD (flowering time under full irrigation  
137 and long day), FTRILD (flowering time under restricted irrigation and long day), FTFISD  
138 (flowering time under full irrigation and short day), FTRISD (flowering time under restricted

139 irrigation and short day), FLT\_BLUP (BLUP of flowering time across environments),  
140 MFISD (maturity under full irrigation and short day), MRISD (maturity under restricted  
141 irrigation and short day), MAT\_BLUP (BLUP of maturity across environments), SSFISD  
142 (seed size under full irrigation and short day), SSRISD (seed size under restricted irrigation  
143 and short day), SS\_BLUP (BLUP of seed size across environments). In addition, using both  
144 genomic and phenotypic data, narrow sense heritability was estimated using RRBLUP  
145 package in R (Endelman, 2011).

## 146 **QTL and Epistasis Mapping**

147 QTL mapping was performed for all traits using the stepwise regression model  
148 implemented in TASSEL 5.0 standalone version (Bradbury *et al.*, 2007). The approach  
149 implements both forward inclusion and backward elimination steps. The model accounts for  
150 major effect loci and reduces collinearity among markers. The model was designed for multi-  
151 parental populations and no family term was used in the model since MAGIC population  
152 development involved several steps of intercross that reshuffles the genome and minimizes  
153 phenotype-genotype covariance. A total of 32,130 SNPs across 305 RILs were used in the  
154 analysis. A permutation of 1000 was used in the analysis.

155 To characterize the epistatic genetic architecture underlying flowering time, maturity,  
156 and seed size, the Stepwise Procedure for constructing an Additive and Epistatic Multi-Locus  
157 model (SPAEMML; (Chen *et al.*, 2018)) epistasis pipeline implemented in TASSEL 5.0 was  
158 used to perform epistasis mapping for phenotypic traits (FTFILD, FTRILD, FTFISD,  
159 FTRISD, FT\_BLUP, MFISD, MRISD, MT\_BLUP, SSFISD, SSRISD, and SS\_BLUP). One  
160 critical advantage of SPAEMML that led to its consideration for this study is its ability to  
161 correctly distinguish between additive and epistatic QTL. SPAEMML source code is available  
162 at <https://bitbucket.org/wdmetcalf/tassel-5-threaded-model-fitter>. The minor allele frequency  
163 of each QTL was estimated using a custom R script from <http://evachan.org/rscripts.html>.  
164 The proportion of phenotypic variation explained (PVE) by each QTL from both QTL and  
165 Epistasis mapping was estimated by multiplying the  $R^2$  obtained from fitting a regression  
166 between the QTL and the trait of interest by 100. The regression model for estimating PVE  
167 is;

$$168 \quad y_{ij} = \mu + \gamma_i + \epsilon_{ij} \quad [1]$$

169 where  $y_{ij}$  is the phenotype,  $\mu$  is the overall mean,  $\gamma_i$  is the term for QTL, and  $\epsilon_{ij}$  is the residual  
170 term.

171

172 A set of *a priori* genes (n=100; Data S1) was developed from *Arabidopsis thaliana*  
173 and *Glycine max* flowering time and seed size genes obtained from literature and  
174 [https://www.mpipz.mpg.de/14637/Arabidopsis\\_flowering\\_genes](https://www.mpipz.mpg.de/14637/Arabidopsis_flowering_genes). The cowpea orthologs of  
175 these genes were obtained by blasting the *A. thaliana* and *G. max* sequence of the *a priori*  
176 genes on the new *Vigna* genome assembly *v.1* on Phytozome (Goodstein *et al.*, 2012). The  
177 corresponding cowpea gene with the highest score was selected as a putative ortholog.  
178 Colocalizations between the cowpea putative orthologs and QTL were identified using a  
179 custom R script.

## 180 **Marker Assisted Selection Pipeline**

181 In order to evaluate the performance of MAS in cowpea, a custom pipeline was  
182 developed in R. First, using subbagging approach, 80% of the 305 RILs randomly sampled  
183 without replacement was used as the training population; followed by performing a Multi-  
184 locus GWAS (Multi-locus Mixed Model, MLM) (Segura *et al.*, 2012) on both genomic and  
185 phenotypic data of the training population. The MLM approach implements stepwise  
186 regression involving both forward and backward regressions. This model accounts for major  
187 effect loci and reduces the effect of allelic heterogeneity. A K-only model that accounts for a  
188 random polygenic term (kinship relationship matrix) was used in the MLM model. No term  
189 for population structure was used in the model since MAGIC population development  
190 involved several steps of intercross that reshuffles the genome and minimizes phenotype-  
191 genotype covariance. A total of 32130 SNPs across 305 RILs were used in the GWAS  
192 analysis and coded as -1 and 1 for homozygous SNPs and 0 for heterozygous SNPs.  
193 Bonferroni correction with  $\alpha = 0.05$  was used to determine the cut-off threshold for each trait  
194 association ( $\alpha/\text{total number of markers} = 1.6 \text{ e-}06$ ).

$$195 \quad y = X\beta + Zu + e \quad [2]$$

196 where  $y$  is the vector of phenotypic data,  $\beta$  is a vector of fixed effects other than SNP or  
197 population structure effects;  $u$  is an unknown vector of random additive genetic effects from  
198 multiple background QTL for RILs.  $X$  and  $Z$  are incident matrices of 1s and 0s relating  $y$  to  $\beta$   
199 and  $u$  (Yu *et al.*, 2006).

200 Second, top three most significant associations were then selected from the genomic  
201 data of the training population to train a regression model by fitting the SNPs in a regression  
202 analysis with the phenotypic information. This training model was later used alongside the  
203 predict function in R to predict the phenotypic information of the validation population (20%  
204 that remained after sub-setting the training population). The prediction accuracy of MAS was



205 obtained as the correlation between this predicted phenotypic information and the observed  
206 phenotypic information for the validation data.

## 207 **Genomic Selection Pipeline**

208 In order to evaluate the performance of using known QTL as fixed effects in GS  
209 models and to compare the performance of parametric, semi-parametric and non-parametric  
210 GS models; a custom GS pipeline was developed in R. The GS pipeline was made up of four  
211 GS models, which were named as FxRRBLUP (Ridge Regression BLUP where markers were  
212 fitted as both fixed and random effects; parametric), RRBLUP (RRBLUP where markers  
213 were only fitted as random effects; parametric), Reproducing Kernel Hilbert Space (RKHS;  
214 semi-parametric), and Support Vector Regression (SVR; non-parametric). First, using  
215 subbagging approach, 80% of the RILs were randomly sampled without replacement (training  
216 population) followed by running MLMM GWAS and selecting the three most significant  
217 associations, which were used as fixed effects in the FxRRBLUP. These three SNPs were  
218 removed from the rest of SNPs that were fitted as random effects in the FxRRBLUP model.  
219 The RRBLUP, RKHS, and SVR models were fitted simultaneously in the same cycle as  
220 FxRRBLUP to ensure unbiased comparison of GS models. Likewise, in order to ensure  
221 unbiased comparison between GS and MAS approaches; similar seed numbers were used for  
222 the subbagging sampling of training populations across 100 cycles for GS and MAS. The  
223 validation set was composed of the remaining 20% of the RILs after sampling the 80%  
224 (training set). Prediction accuracy in GS was estimated as the Pearson correlation between  
225 measured phenotype and genomic estimated breeding values of the validation population.  
226 Also, for flowering time, each environment was used as a training population to predict the  
227 other three environments.

## 228 **Ridge Regression BLUP (RRBLUP)**

229 The RRBLUP models without and with fixed effects can be described as;

230

$$231 \quad \mathbf{y} = \mu + \sum_{m=1}^p \mathbf{Z}_m u_m + \mathbf{e} \quad [3]$$

232

$$233 \quad \mathbf{y} = \mu + \sum_{k=1}^q \mathbf{X}_k \alpha_k + \sum_{m=1}^p \mathbf{Z}_m u_m + \mathbf{e} \quad [4]$$

234

235 where  $\mathbf{y}$  is the vector ( $n \times 1$ ) of observations (simulated phenotypic data),  $\mu$  is the vector of  
236 the general mean,  $q$  is the number of selected significant associated markers ( $q=3$ ),  $\mathbf{X}_k$  is the  
237  $k^{\text{th}}$  column of the design matrix  $\mathbf{X}$ ,  $\alpha$  is the fixed additive effect associated with markers  $k \dots$



238  $q$ ,  $\mathbf{u}$  random effects term, with  $E(u_m) = 0$ ,  $Var(u_m) = \sigma_{u_m}^2$  (variance of marker effect),  $p$  is the  
239 marker number ( $p > n$ ),  $\mathbf{Z}_m$  is the  $m^{\text{th}}$  column of the design matrix  $\mathbf{Z}$ ,  $\mathbf{u}$  is the vector of  
240 random marker effects associated with markers  $m \dots p$ . In the model,  $\mathbf{u}$  random effects term,  
241 with  $E(u_m) = 0$ ,  $Var(u_m) = \sigma_{u_m}^2$  (variance of marker effect),  $Var(\mathbf{e}) = \sigma^2$  (residual variance),  
242  $Cov(\mathbf{u}, \mathbf{e}) = 0$ , and the ridge parameter  $\lambda$  equals  $\sigma_e^2 / \sigma_u^2$  (Meuwissen, Hayes and Goddard,  
243 2001; Endelman, 2011; Howard, Carriquiry and Beavis, 2014). In this study RRBLUP with  
244 and without fixed effects were implemented using the *mixed.solve* function in *rrBLUP* R  
245 package (Endelman, 2011).

## 246 **Reproducing Kernel Hilbert Space (RKHS)**

247 Semi-parametric models are known to capture interactions among loci. The semi-  
248 parametric GS approach used in this study was implemented as Bayesian RKHS in *BLGR*  
249 package in R (Perez, 2014), and described as follows:

$$250 \quad \mathbf{y} = \mathbf{1}\mu + \mathbf{u} + \boldsymbol{\varepsilon} \quad [5]$$

251 where  $\mathbf{y}$  is the vector of phenotype;  $\mathbf{1}$  is a vector of 1's;  $\mu$  is the mean;  $\mathbf{u}$  is vector of random  
252 effects  $\sim \text{MVN}(\mathbf{0}, \mathbf{K}_h \sigma_u^2)$ ; and  $\boldsymbol{\varepsilon}$  is the random residual vector  $\sim \text{MVN}(\mathbf{0}, \mathbf{I} \sigma_\varepsilon^2)$ . In Bayesian  
253 RKHS, the priors  $p(\mu, \mathbf{u}, \boldsymbol{\varepsilon})$  are proportional to the product of density functions  $\text{MVN}(\mathbf{0},$   
254  $\mathbf{K}_h \sigma_u^2)$  and  $\text{MVN}(\mathbf{0}, \mathbf{I} \sigma_\varepsilon^2)$ . The kernel entries matrix ( $\mathbf{K}_h$ ) with a Gaussian kernel uses the  
255 squared Euclidean distance between marker genotypes to estimate the degree of relatedness  
256 between individuals, and a smoothing parameter ( $h$ ) multiplies each entry in  $\mathbf{K}_h$  by a  
257 constant. In the implementation of RKHS a default smoothing parameter  $h$  of 0.5 was used  
258 alongside 1,000 burns and 2,500 iterations.

## 259 **Support Vector Regression (SVR)**

260 Support vector regression method (Vapnik, 1995; Maenhout *et al.*, 2007; Long *et al.*,  
261 2011) was used to implement non-parametric GS approach in this study. The aim of the SVR  
262 method is to minimize prediction error by implementing models that minimizes large  
263 residuals (Long *et al.*, 2011). Thus, it is also referred to as the “ $\varepsilon$ -intensive” method. It was  
264 implemented in this study using the normal radial function kernel (*rbfdot*) in the *ksvm*  
265 function of *kernlab* R package (Karatzoglou *et al.*, 2004).

## 266 **Parameters evaluated in GS and MAS**

267 Additional parameters were estimated to further evaluate the performance of GS and  
268 MAS models. A regression model was fitted between observed phenotypic information and

269 GEBV of the validation set to obtain both intercept and slope for both GS and MAS in each  
270 cycle of prediction. The estimates of the intercept and slope of the regression of the observed  
271 phenotypic information on GEBVs are valuable since their deviations from expected values  
272 can provide insight into deficiencies in the GS and MAS models (Daetwyler *et al.*, 2013).  
273 The bias estimate (slope and intercept) signify how the range of values in measured and  
274 predicted traits differ from each other. In addition, the coincidence index between the  
275 observed and GEBVs for both GS and MAS models was evaluated. The coincidence index  
276 (Fernandes *et al.*, 2018) evaluates the proportion of individuals with highest trait values  
277 (20%) that overlapped between the measured phenotypes and predicted phenotypic trait  
278 values for the validation population.

### 279 **Evaluation of the effect of marker density and training population size**

280 The effect of marker density and training population size on GS performance were  
281 evaluated. GS was performed using 20% (6426 SNPs), 40% (12852), 60% (19278), and 80%  
282 (25704) of the total number of markers available in this study (32130). Each proportion of the  
283 aforementioned marker densities was randomly sampled without replacement and used for  
284 training GS models and predict in the validation set and repeated for 100 cycles.  
285 Furthermore, to evaluate the effect of training population size on prediction accuracy, four  
286 levels (20% (61 RILs), 40% (122 RILs), 60% (183 RILs), and 80% (244 RILs)) of total  
287 population size (305 RILs) were used to train GS model and validate only 20% (61 RILs) of  
288 the total population size (305 RILs). Subbagging approach was used to subset the training and  
289 validation sets at a time and repeated for 100 cycles.

## 290 **Results**

### 291 **Phenotypic and genotypic variation in cowpea**

292 Results showed variation between number of days to 50% flowering under long-day  
293 photoperiod and short-day photoperiod. Days to flowering time were higher for RILs under  
294 long-day than short-day (Figure 1). Results showed positive correlations between  
295 environments for each trait (Table S1 and S2). Furthermore, genomic heritability were  
296 moderate for the traits ranging between 0.41 under long day photoperiod to 0.48 for  
297 flowering time under short-day photoperiod , 0.21 under restricted irrigation to 0.30 under  
298 full irrigation for maturity, and 0.39 under restricted irrigation to 0.47 under full irrigation for  
299 seed size (Table S1 and S2).

300

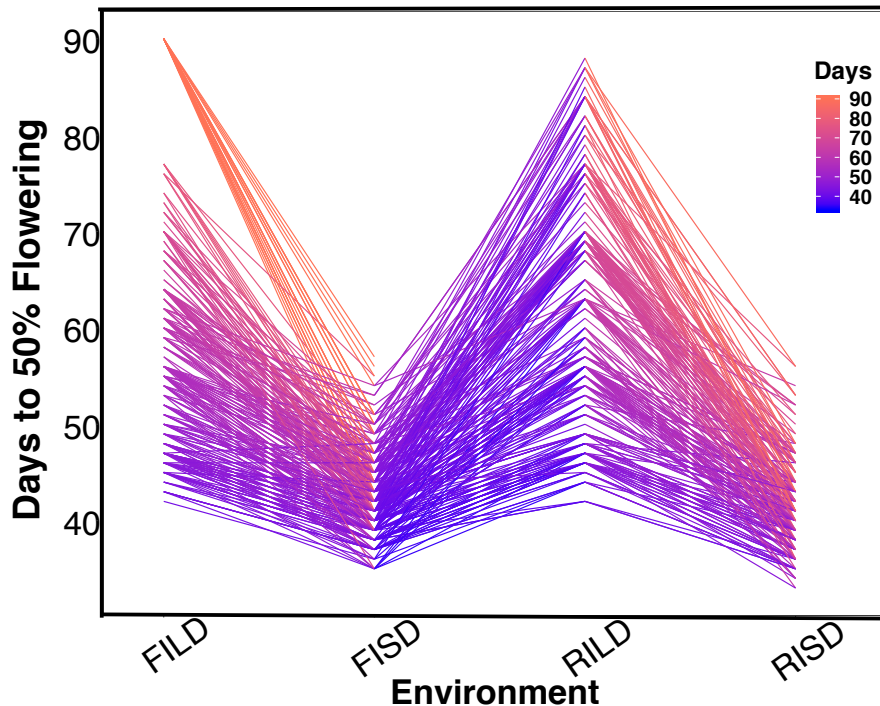

301

302 **Figure 1: The norm of reaction plot for flowering time variation under long-day and short-day periods.**

303 Evaluation environments are represented on the x-axis (full irrigation and long day [FILD], full irrigation and  
304 short day [FISD], restricted irrigation and long day [RILD], and restricted irrigation and short day [RISD]). The  
305 number of days to 50% flowering is represented on the y-axis.

### 306 Genetic architecture of traits

#### 307 Main effect QTL

308 The cowpea MAGIC population facilitated the characterization of the genetic  
309 architecture of flowering time, maturity and seed size. In this study QTL associated with  
310 flowering time, maturity, and seed size were identified using stepwise regression analysis  
311 (Table S3, Data S2). Results showed that 32 QTL (22 unique) in total were associated with  
312 flowering time traits (FT\_BLUP [8 QTL, explaining 73.2 % of phenotypic variation (PV)],  
313 FTFILD [5 QTL, explaining 66.2% of PV], FTRILD [5 QTL explaining 48.6% of PV],  
314 FTFISD [8 QTL explaining 52.1% of PV], and FTRISD [6 QTL explaining 43.9% of PV]).  
315 Each of the total QTL associated with flowering time traits explained between 2% to 28% of  
316 the phenotypic variation. QTL qVu9:23.36, qVu9:24.77, and qVu9:22.65 (MAF= 0.29, 0.28,  
317 and 0.49) explained the largest proportion of variation (28%, 24%, and 19%) with additive  
318 effects of 7, 7, and 6 days respectively. The minor allele frequency (MAF) of the flowering  
319 time QTL ranges from 0.13 to 0.50. For maturity traits, 13 QTL (11 unique QTL) in total  
320 were identified with five QTL (explaining 35.9% of PV) for MAT\_BLUP, 4 QTL (explaining  
321 24.5% of PV) for MFISD, and 4 QTL (explaining 27.9% of PV) for MRISD. All maturity

322 traits QTL explained between 4.5 to 10% of phenotypic variation and MAF ranges from 0.15  
323 to 0.49.

324 Furthermore, for seed size traits, 10 QTL (7 unique QTL) in total were identified with  
325 3 QTL (explaining 39.3% of PV) for SS\_BLUP, 3 QTL (explaining 41% of PV) for SSFISD,  
326 and 4 QTL (explaining 39.4% of PV) for SSRISD. QTL qVu8:74.21, qVu8:74.29,  
327 qVu8:76.81 associated with SSFISD, SS\_BLUP, and SSRISD explained the largest PV  
328 (29%, 25%, and 20%). All seed size trait QTL explained between 3 to 29% of PV and with  
329 MAF range between 0.21 and 0.49. A pleiotropic QTL qVu8:74.21 (MAF=0.24) was  
330 associated with both MRISD and SSRISD (explained 5% and 29% of PV respectively).

### 331 **Two-way epistatic interaction QTL**

332 Currently there is limited knowledge about what role epistasis plays in phenotypic  
333 variation in cowpea. Our results identified epistatic QTL underlying flowering time, maturity,  
334 and seed size (Table S4, Data S3). For flowering time traits, there were 42 two-way epistatic  
335 interactions at 84 epistatic loci (only 65 loci were unique). Among these are; 20 epistatic loci  
336 for FLT\_BLUP, 18 epistatic or FTFILD, 12 epistatic loci for FTRILD, 14 epistatic loci for  
337 FTFISD, and 20 epistatic loci for FTRISD. Some large effect loci were involved in epistatic  
338 interactions in flowering time; examples include, QTL qVu9:25.39 (MAF=0.28, FT\_BLUP  
339 PVE=23.5%, FTFILD PVE=24.5%, FTRILD PVE=26%) and QTL qVu9:3.46 (MAF=0.35,  
340 FLT\_BLUP PVE=13.5%, FTRILD PVE=14.1%). For maturity, there were 17 pairwise  
341 epistatic interactions across 34 loci (of which 30 were unique). Among the maturity QTL,  
342 qVu9:8.37 had the largest effect explaining ~9% of the phenotypic variation. One epistatic  
343 interaction overlapped with both FTRISD, MRISD, and MT\_BLUP (qVu2:48.05+  
344 qVu9:8.37, MAF=0.30 and 0.39 respectively). For seed size, there were 13 interactions at 26  
345 loci (19 were unique). Only one QTL (qVu8:74.29, MAF=0.25) had interactions with  
346 multiple QTL. The largest effect epistatic QTL associated with the three seed size traits  
347 (SS\_BLUP, SSFISD, and SSRISD) is qVu8:74.29 (MAF0.25). Some QTL were found to  
348 overlap among main effect QTL and epistatic effect QTL for flowering time (nine QTL),  
349 maturity (three QTL), and seed size (three QTL) (Figure S1).

### 350 **Main effect and epistatic QTL colocalized with *a priori* genes**

351 Gene functions can be conserved across species (Huang *et al.*, 2017). In this study, a  
352 set of *a priori* genes was compiled from both *A. thaliana* and *G. max*. Both main effect QTL  
353 and epistatic QTL colocalized with putative cowpea orthologs of *A. thaliana* and *G. max*  
354 flowering time and seed size genes (Figure 2 - 5, Figure S2 - S11, Data S4). A putative  
355 cowpea ortholog (Vigun09g050600) of *A. thaliana* circadian clock gene *phytochrome E*

356 (*PHYE*; AT4G18130) (Aukerman and Sakai, 2003) colocalized with FTFILD QTL  
357 (qVu9:22.65; PVE=19.5%; main effect QTL) at the same genetic position. Also, a putative  
358 cowpea ortholog (Vigun07g241700) of *A. thaliana* circadian clock gene *TIME FOR*  
359 *COFFEE* (*TIC*; AT3G22380) (Hall *et al.*, 2003) colocalized at the same genetic position with  
360 FTFISD QTL (qVu7:86.92; PVE=2.6%; main effect QTL). The cowpea flowering time gene  
361 (*VuFT*; Vigun06g014600; CowpeaMine v.06) colocalized with an epistatic QTL (qVu6:0.68;  
362 PVE=3.5%) associated with FLT\_BLUP and FTRILD at the same genetic position. The  
363 cowpea ortholog (Vigun11g157600) of *A. thaliana* circadian clock gene *PHYTOCLOCK1*  
364 (*PCLI*; AT3G46640) (Hazen *et al.*, 2005) colocalized with an epistatic QTL (qVu11:50.94;  
365 PVE=8-10%) associated with both FTFILD and FTRILD at the same genetic position. A  
366 putative cowpea ortholog (Vigun11g148700) of *A. thaliana* photoperiod gene *TARGET OF*  
367 *EAT2* (*TOE2*; AT5G60120) (Mathieu *et al.*, 2009) was found at a proximity of 0.6cM from a  
368 QTL (qVu11:49.06; PVE=7-11%; main effect QTL) associated with FTFILD, FTRILD, and  
369 FLT\_BLUP. Some of the *a priori* genes colocalized with some QTL that are both main effect  
370 and epistatic QTL. For instance, the cowpea ortholog (Vigun01g205500) of *G. max* flowering  
371 time gene *phytochrome A* (*PHYA*; Glyma19g41210) (Tardivel *et al.*, 2014) colocalized with a  
372 FTFILD QTL (qVu1:66.57; PVE=5.3%; both main effect and epistatic QTL) at the same  
373 genetic position (Data S4). Lastly, a putative cowpea ortholog (Vigun08g217000) of *A.*  
374 *thaliana histidine kinase2* gene (*AHK2*; AT5G35750) (Orozco-Arroyo *et al.*, 2015) was  
375 found at a proximity of about 1-2cM from three QTL (qVu8:74.29, qVu8:74.21, qVu8:76.81;  
376 PVE=25%, 29.3%, and 20% respectively; main effect and epistatic QTL) associated with  
377 seed size traits SS\_BLUP, SSFISD, and SSRISD).

378 In addition, some *a priori* genes were associated with multiple traits. The putative  
379 cowpea ortholog (Vigun05g024400) of *A. thaliana* circadian clock gene *CONSTANS* (*CO*;  
380 AT5G15840) (Wenkel *et al.*, 2006) colocalized at the same genetic position with a QTL  
381 (qVu5:8.5; PVE=6-8%; both main effect and epistatic QTL) associated with flowering time  
382 and maturity traits (FLT\_BLUP, FTFISD, FTRILD, FTRISD, MAT\_BLUP, and MFISD);  
383 The putative cowpea ortholog (Vigun09g025800) of *A. thaliana* circadian clock gene  
384 *ZEITLUPE* (*ZTL*; AT5G57360) (Somers *et al.*, 2000) colocalized at the same genetic position  
385 with a QTL (qVu9:8.37; PVE=9-11%; both main effect and epistatic QTL) associated with  
386 flowering time and maturity traits (FTFISD, FTRISD, and MRISD).  
387

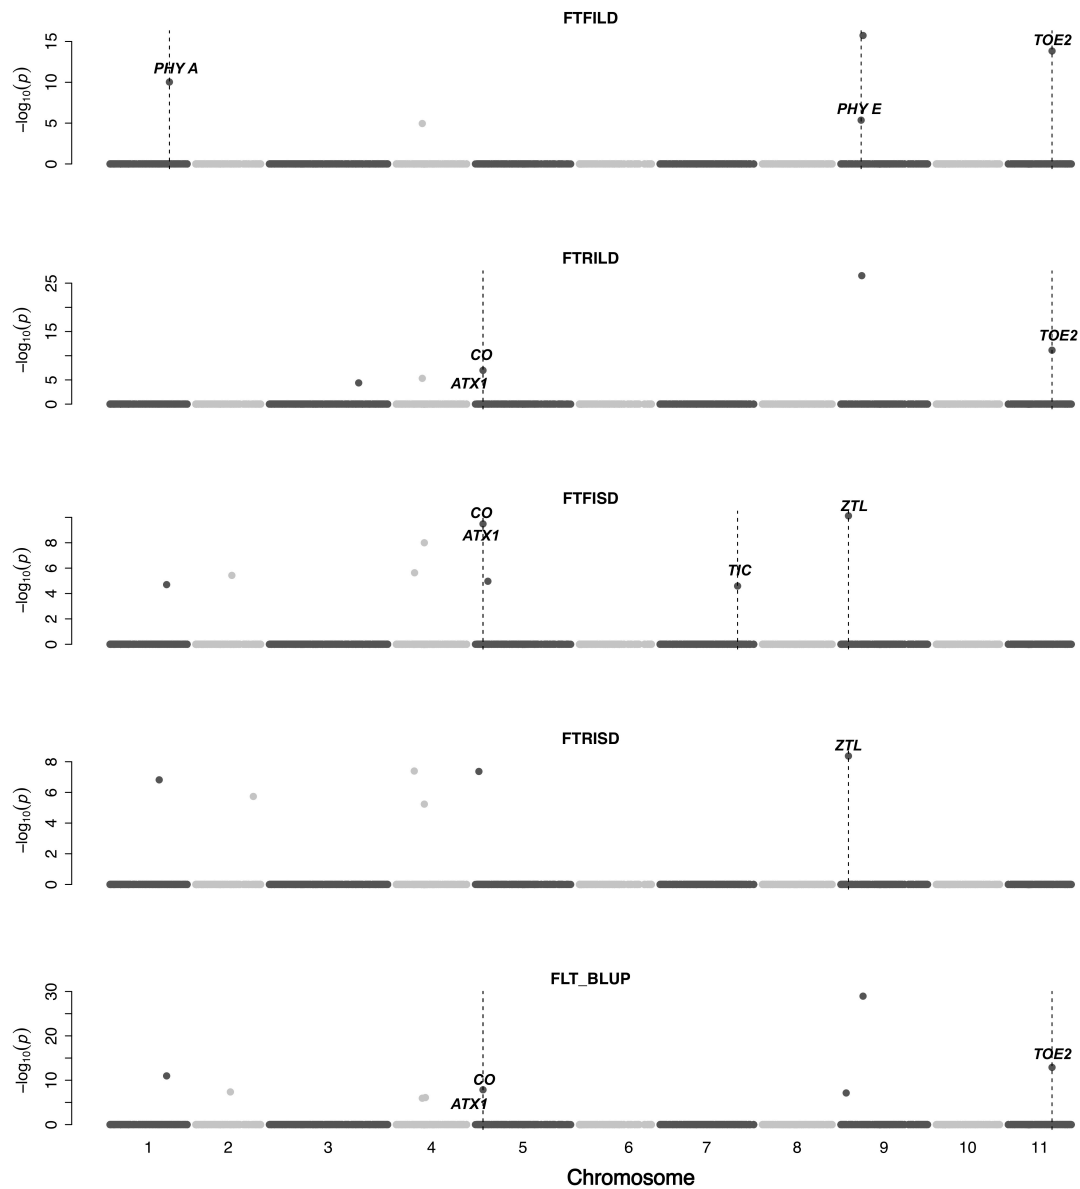

388

389 **Figure 2: Main QTL plot for flowering time traits in the cowpea MAGIC population.** QTL plots for  
390 flowering time under full irrigation and long day (FTFIELD), flowering time under restricted irrigation and long  
391 day (FTRILD), flowering time under full irrigation and short day (FTFISD), flowering time under restricted  
392 irrigation and short day (FTRISD), and BLUPs of environments (FLT\_BLUP). The chromosome numbers are  
393 located on the x-axis and the negative log of the *P*-values on the y-axis. The genetic position of the  
394 colocalization between QTL and *a priori* genes are indicated by broken vertical lines. The texts displayed on the  
395 vertical broken lines are the names of *a priori* genes.

396



397

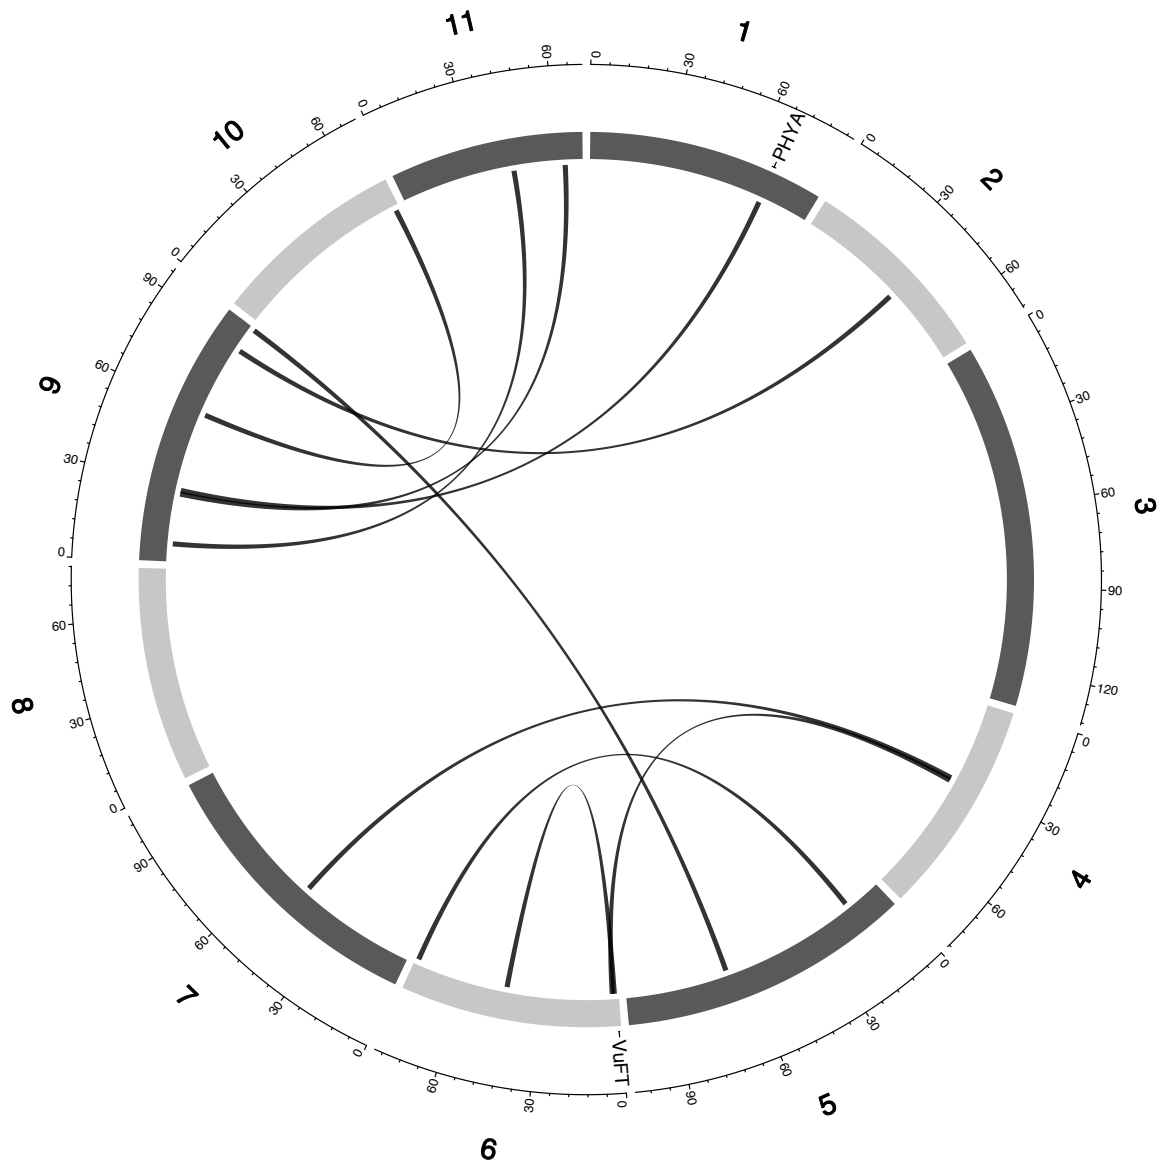

398

399 **Figure 3: Epistatic QTL for FLT\_BLUP for MAGIC population.** Chromosomes are shown in shades of

400 gray, two-way interacting loci are connected with black solid lines, and colocalized a priori genes

401 between chromosomes and genetic map.



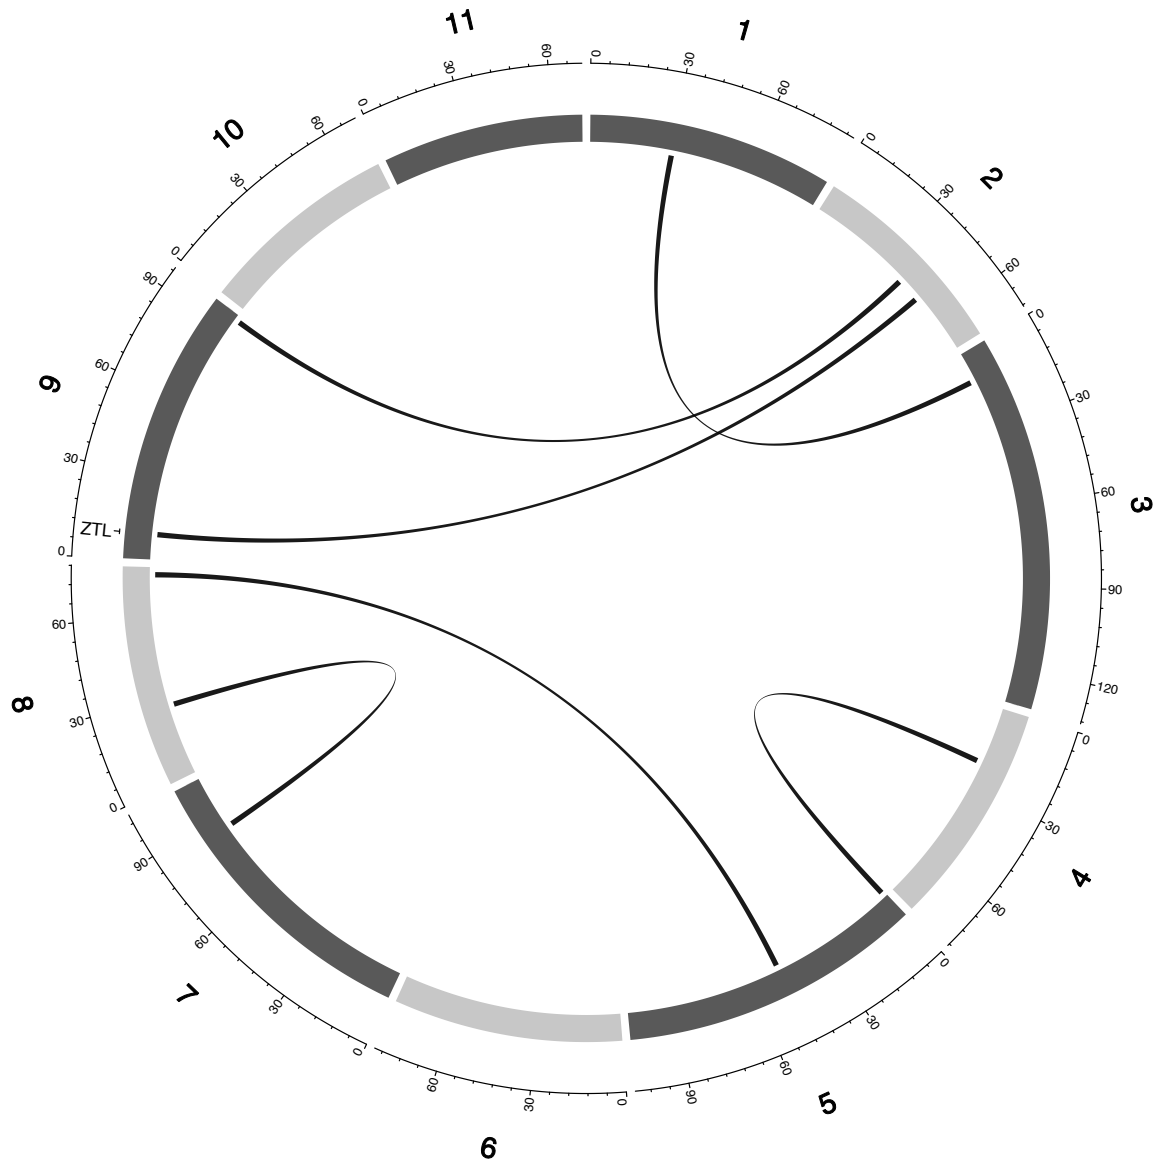

402

403 **Figure 4: Epistatic QTL for MAT\_BLUP in MAGIC population.** Chromosomes are shown in shades of  
404 gray, two-way interacting loci are connected with black solid lines, and colocalized a priori genes  
405 between chromosomes and genetic map.

406

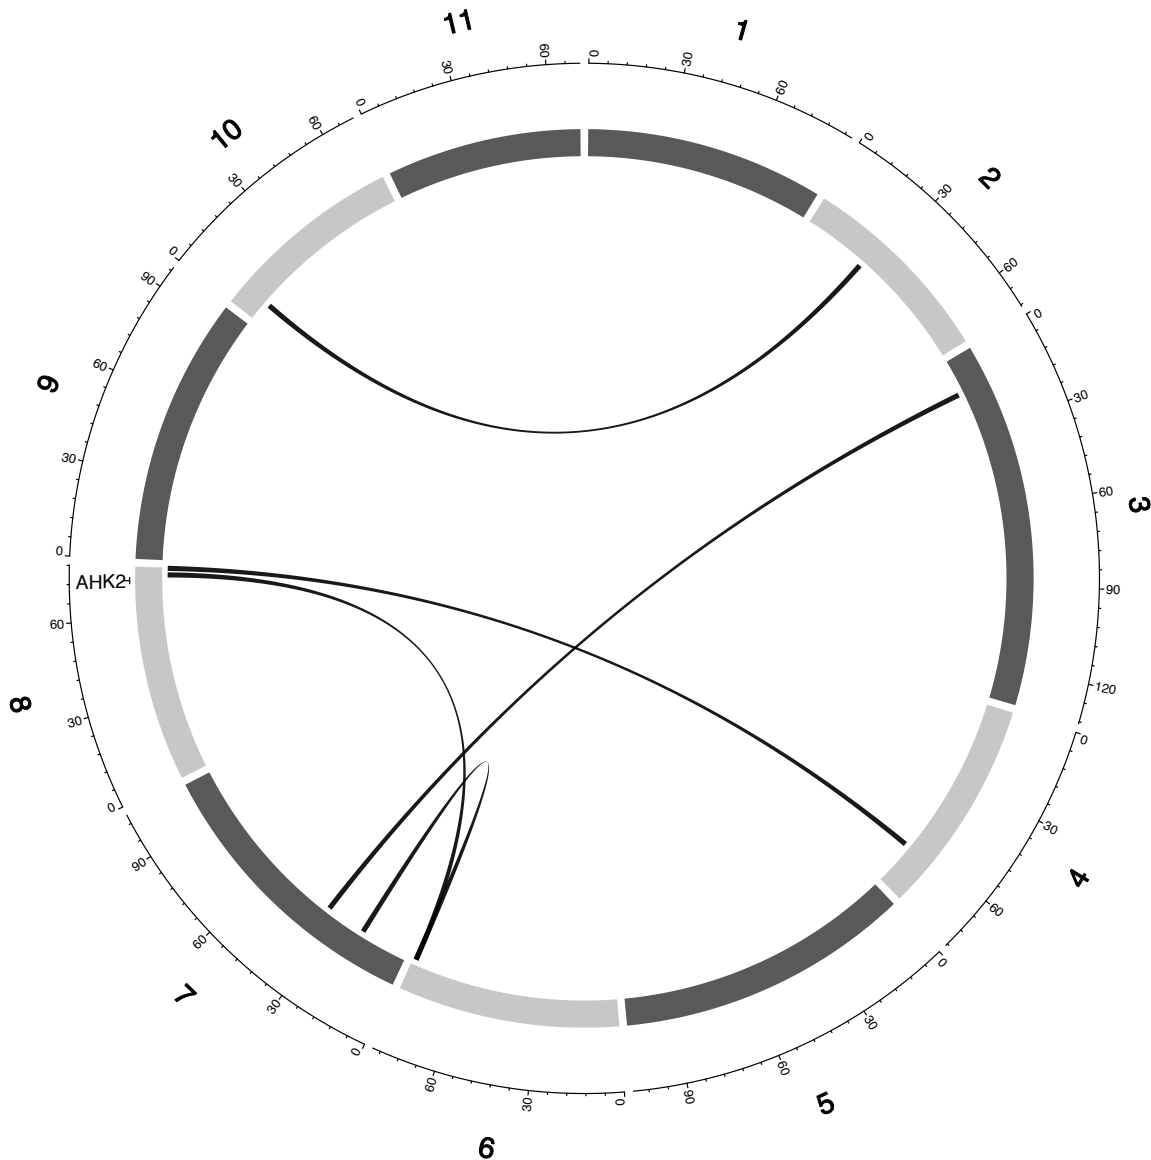

407

408 **Figure 5: Epistatic QTL for MAT\_BLUP in MAGIC population.** Chromosomes are shown in shades of  
409 gray, two-way interacting loci are connected with black solid lines, and colocalized a priori genes are  
410 texts between chromosomes and genetic map.

#### 411 **GS and MAS for flowering time**

412 Prior knowledge about the genetic architecture of a trait can help make informed  
413 decisions in breeding. First to compare the performance of GS and MAS models for  
414 flowering time within each daylength results showed that under long day length (FTFILD and  
415 FTRILD); FxRRBLUP (mean prediction accuracy [mPA] = 0.68, 0.68; mean coincidence  
416 index [mCI]=0.49, 0.40) and MAS [mPA=0.64, 0.61; mCI=0.45, 0.37] outperformed  
417 RRBLUP [mPA=0.55, 0.58; mCI=0.37, 0.35], RKHS [mPA=0.55, 0.58; mCI=0.37, 0.36],  
418 and SVR [mPA=0.54, 0.50; mCI=0.35, 0.28] (Figures 6 and 7, Table S 3 and 4). For  
419 flowering time under long day, coincidence index values were higher under full irrigation

420 than under restricted irrigation. For flowering time under short day (FTFISD and FTRISD),  
421 all GS models outperformed MAS [mPA=0.33, 0.25; mCI=0.30, 0.26]. Among the GS  
422 models, RKHS and RRBLUP had the highest prediction accuracies. However, the  
423 coincidence index of FxRRBLUP was higher than the rest of the GS models for FTRISD. In  
424 general, the mean of the slope and intercept for the GS models except SVR were usually  
425 close to the expected (1 and 0) (Figure S12-S13). MAS also deviated away from the expected  
426 slope and intercept (1 and 0) more than the FxRRBLUP, RKHS, and RRBLUP for FTRISD  
427 (Figure S12-S13). Second to evaluate the effect of photoperiod and irrigation regime on the  
428 performance of training population, each environment (day length and irrigation regime  
429 combination) was used as a training population to predict the rest in a di-allele manner.  
430 Results showed that prediction accuracy between environments in the same photoperiod was  
431 higher than environments in different photoperiod (Figure S14). Also, when training  
432 populations were under full irrigation, their prediction accuracies were higher than when  
433 training populations were under restricted irrigation (Figure S14). For FT\_BLUP, GS models  
434 outperformed MAS except SVR which had the same mPA [0.59] as MAS while FxRRBLUP  
435 had the highest mPA and mCIs among the GS models (Figure S 15 and 16).

#### 436 **GS and MAS for maturity and seed size**

437 For maturity (MT\_BLUP, MFISD, and MRISD), RKHS and RRBLUP had better  
438 performance (Figures 6 and 7; Table S4 and S5) than the rest of the models including MAS.  
439 All models deviated from the expected slope and intercept estimates, but RRBLUP had the  
440 least deviation for MRISD. For seed size, FxRRBLUP had the best performance followed by  
441 MAS compared to the rest of the GS models (RKHS, RRBLUP, and SVR) (Figures 6 and 7;  
442 Table S5 and S6). GS and MAS models had varying levels of deviation from the expected  
443 estimates of slope and intercept. RKHS and RRBLUP were closer to the expected than  
444 FxRRBLUP and MAS (Figure S12-S13). SVR had the highest deviation.

#### 445 **Effect of marker density and training population size**

446 The effect of marker density and population size on GS in cowpea was investigated  
447 with the aim of making recommendations for resource limited national research centers in  
448 developing countries. For the effect of marker density on prediction accuracy, no significant  
449 relationship was observed between marker densities for MTBLUP while a significant  
450 increase in prediction accuracy was only observed between marker density 20% - 60% for  
451 FTBLUP, and between marker densities 40% - 60% and 40% - 80% for SSBLUP (Figure  
452 S19A). For the training population size effect, results revealed that prediction accuracy  
453 increased with increasing the size of the training set. All difference between training set sizes

454 were significantly increased with the training population size increase (Tukey test  $P$ -value <  
455 0.001) (Figure S19B).

456

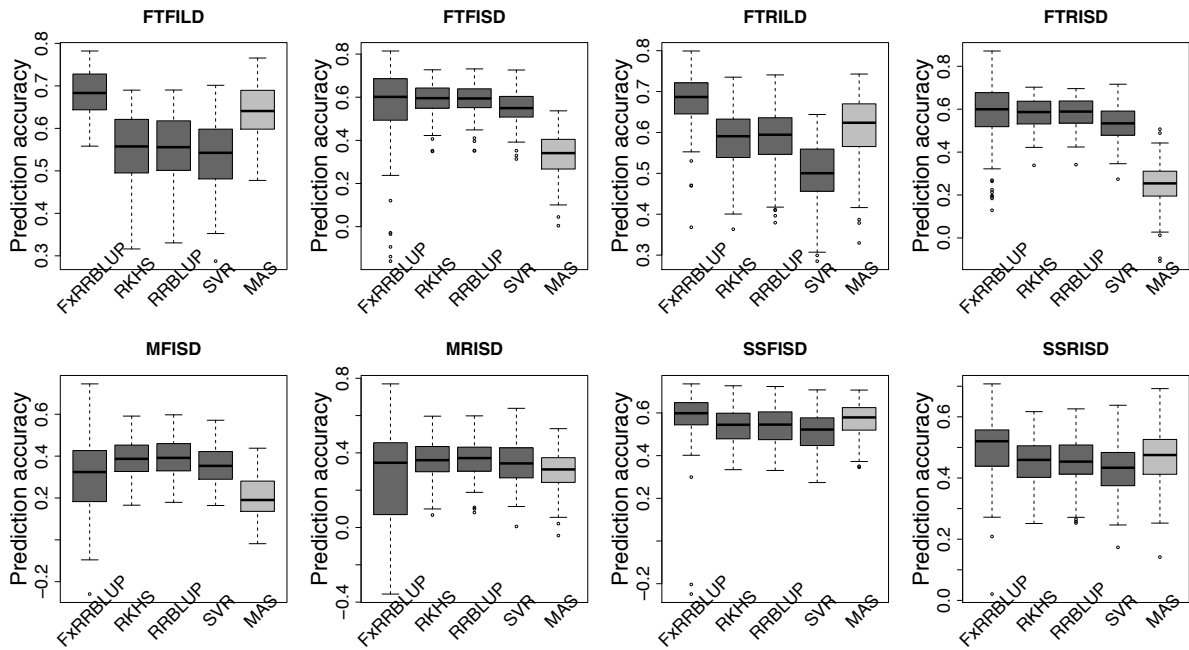

457

458 **Figure 6: Comparison of prediction accuracy across GS and MAS models.** Boxplots in each panel showed the  
459 distribution of prediction accuracy values across 100 cycles for FxRRBLUP (Ridge Regression Best Linear Unbiased  
460 Prediction: Parametric model with fixed effects), RKHS (Reproducing Kernel Hilbert Space; Semi-Parametric model),  
461 RRBLUP (Ridge Regression Best Linear Unbiased Prediction: Parametric model with no fixed effects), SVR (Support  
462 Vector Regression: Non-Parametric model), and MAS (Marker Assisted Selection) for flowering time under full irrigation  
463 and long day (FTFILD), flowering time under restricted irrigation and long day (FTRILD), flowering time under full  
464 irrigation and short day (FTFISD), flowering time under restricted irrigation and short day (FTRISD), maturity under full  
465 irrigation and short day (MFISD), maturity under restricted irrigation and short day, seed size under full irrigation and short  
466 day (SSFISD), and seed size under restricted irrigation and short day (SSRISD).

467 s

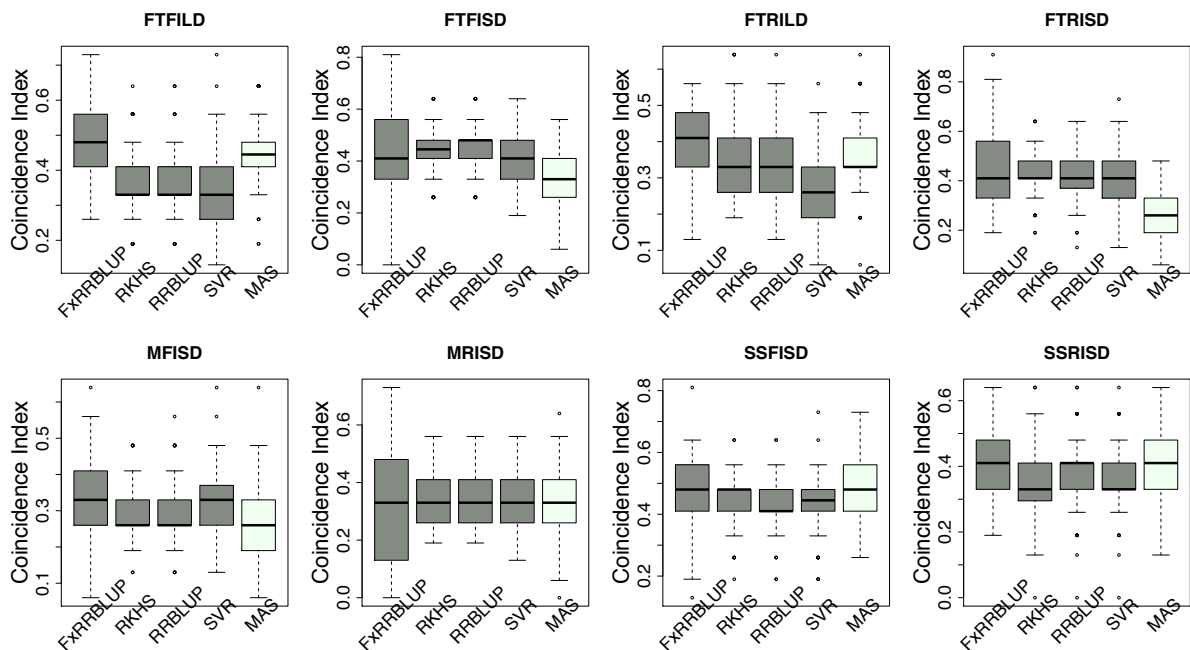

468

469 **Figure 7: Comparison of coincidence index across GS and MAS models.** Boxplots in each panel showed the distribution  
 470 of coincidence index values across 100 cycles for FxRRBLUP (Ridge Regression Best Linear Unbiased Prediction:  
 471 Parametric model with fixed effects), RKHS (Reproducing Kernel Hilbert Space; Semi-Parametric model), RRBLUP (Ridge  
 472 Regression Best Linear Unbiased Prediction: Parametric model with no fixed effects), SVR (Support Vector Regression:  
 473 Non-Parametric model), and MAS (Marker Assisted Selection) for flowering time under full irrigation and long day  
 474 (FTFILD), flowering time under restricted irrigation and long day (FTRILD), flowering time under full irrigation and short  
 475 day (FTFISD), flowering time under restricted irrigation and short day (FTRISD), maturity under full irrigation and short  
 476 day (MFISD), maturity under restricted irrigation and short day, seed size under full irrigation and short day (SSFISD), and  
 477 seed size under restricted irrigation and short day (SSRISD).

## 478 Discussion

### 479 Epistasis play important roles in determining the genetic architecture of agronomic 480 traits in cowpea

481 Multi-parental populations have demonstrated ability to facilitate robust characterization  
 482 of genetic architecture in terms of genetic effect size, pleiotropy, and epistasis (Buckler *et al.*,  
 483 2009; Brown *et al.*, 2011; Peiffer *et al.*, 2014; Bouchet *et al.*, 2017; Mathew *et al.*, 2018).  
 484 Using the cowpea MAGIC population, this study showed that both additive main QTL and  
 485 additive x additive epistatic QTL with large and (or) moderate effects underlie flowering  
 486 time, maturity, and seed size in cowpea. Although most of the epistatic QTL identified were  
 487 two-way interacting loci, results showed some of them were involved in interactions with  
 488 more than one independent loci (Figure 3-5 and Figure S4-11). This implies the possibility of  
 489 three-way epistatic interactions underlying some of the traits. Our inability to identify and  
 490 discuss three-way epistatic interactions is due to the mapping approach used, which only  
 491 mapped two-way epistatic interactions. Three-way epistatic interactions have been found to  
 492 underlie flowering time in the selfing crop specie barley (Mathew *et al.*, 2018). Furthermore,  
 493 overlaps between main and epistatic QTL (Figure S2) indicate these to be main QTL that are

494 involved in epistatic interactions with other loci. However, one caveat that may also be  
495 responsible for some of the QTL among the overlaps is the false positive rate of SPEAML.  
496 The SPEAML software used for epistasis mapping showed high false positive rate with a  
497 sample size of 300 individuals (Chen *et al.*, 2018). It is possible that some of the overlapped  
498 QTL are main QTL that were miscategorized as epistatic loci by SPEAML since our cowpea  
499 MAGIC population had 305 RILs.

500 Flowering time is an important adaptive trait in breeding. In this study, our results  
501 demonstrated that the flowering time variation in cowpea is due to large and moderate main  
502 effects and epistatic loci (Table S3 and Table S4). Epistatic loci underlie flowering time in  
503 both selfing (Huang *et al.*, 2013; Juenger *et al.*, 2005; Komeda, 2004; Mathew *et al.*, 2018)  
504 (Chen *et al.*, 2018)(Li *et al.*, 2018) and outcrossing (Buckler *et al.*, 2009; Durand *et al.*, 2012)  
505 species. In addition, the effect size of flowering time loci differs between selfing and out  
506 crossing species as QTL effect sizes are large in the former (Lin, Schertz and Paterson, 1995;  
507 Maurer *et al.*, 2015) and small in the later (Buckler *et al.*, 2009). In the present study, the  
508 large effects (up to 25% PVE and additive effect of 7 days) flowering time loci were only  
509 identified under long day photoperiod and not under short-day photoperiod (Table S3 and  
510 Table S4). The loci detected under short day photoperiod were of moderate effects  
511 (PVE=1%-10% and maximum additive effect size of 2 days). A trait's genetic architecture is  
512 a reflection of its stability over evolutionary time and traits subjected to strong recent  
513 selection were characterized with large effect loci (Brown *et al.*, 2011). Our result suggests  
514 that cowpea flowering time adaptation to long-day photoperiod has undergone a recent  
515 selection compared to flowering time under short-day photoperiod.

#### 516 **Distinct and common genetic regulators underlie flowering time**

517 Conserved genetic pathways often underlie traits in plant species (Liu *et al.*, 2013;  
518 Huang *et al.*, 2017). Examination of colocalizations between a priori genes and main effect  
519 and epistatic QTL in this study identified putative cowpea orthologs of *A. thaliana* and *G.*  
520 *max* flowering time and seed size genes that may be underlie phenotypic variation in cowpea.  
521 Flowering time is affected by photoperiodicity and regulated by a network of genes (Sasaki,  
522 Frommlet and Nordborg, 2017) involved in floral initiation, circadian clock regulation, and  
523 photoreception (Lin, 2002). Photoperiod impacted days to flowering time as observed from  
524 the norm of reaction plot for cowpea MAGIC flowering time data which showed drastic  
525 reductions in days to flowering for RILs under short day compared to long days (Figure 1).  
526 Our mapping results (main effect and epistatic) showed both unique and common loci  
527 underlying flowering time under both long and short photoperiod (Figure 1; Figure S4-S8). In

528 addition, certain *a priori* genes were unique to either flowering time under long day or short  
529 day. For instance, cowpea putative orthologs of photoreceptors (*PHY A* [Vigun01g205500]  
530 and *PHY E* [Vigun09g050600]) and circadian clock gene *PHYTOCLOCK1* (*PCL1*  
531 [Vigun11g157600]) colocalized with only QTL associated with flowering time under long  
532 day, while cowpea putative orthologs of circadian clock genes (*Time for Coffee* [*TIC*  
533 (Vigun07g241700)] and *Zeitlupe* [*ZTL*]) colocalized with only QTL associated with  
534 flowering time under short day. However, the cowpea putative ortholog of photoperiod gene  
535 *CONSTANS* (*CO* [Vigun05g024400]) colocalized with QTL associated with flowering time  
536 under both long and short days. Thus, our study suggests that distinct and common genetic  
537 regulators control flowering time adaptation to both long and short-day photoperiod in  
538 cowpea. Further studies utilizing functional approaches will be helpful to decipher gene  
539 regulation patterns under both long and short photoperiod in cowpea.

#### 540 **Genetic architecture influenced GS and MAS performance**

541 GS models differ in their efficiency to capture complex cryptic interactions among  
542 genetic markers (de Oliveira Couto *et al.*, 2017). The traits evaluated in this study are  
543 controlled by both main effect and epistatic loci. In this study, comparison among the GS  
544 models showed that parametric and semi-parametric GS models outperformed non-  
545 parametric GS model for all traits. SVR, a non-parametric model had the least prediction  
546 accuracy and coincidence index and also had the highest bias (Figure S12 and S13). Previous  
547 studies have shown that semi-parametric and non-parametric models increased prediction  
548 accuracy under epistatic genetic architecture (Howard, Carriquiry and Beavis, 2014; Jacquin,  
549 Cao and Ahmadi, 2016). In this study, none of semi-parametric and non-parametric models  
550 outperformed parametric models (Figure 6 and 7). Some of the studies comparing the  
551 performance of parametric, semi-parametric and non-parametric GS models were based on  
552 simulations of traits controlled solely by epistatic genetic architectures. Therefore, the  
553 performance of the models under simulated combined genetic effects (additive + epistasis) is  
554 not well understood. The comparable performance of RKHS to RRBLUP (parametric model)  
555 in this study in terms of prediction accuracy, coincidence index, and bias estimates, attests to  
556 RKHS ability to capture both additive and epistatic interactions (Gianola, Fernando and  
557 Stella, 2006; Gianola and Van Kaam, 2008; De Los Campos *et al.*, 2010; Gota and Gianola,  
558 2014) for both prediction accuracy and selection of top performing lines. The performance of  
559 GS models' is often indistinguishable and RRBLUP has been recommended as an efficient  
560 parametric GS model (Heslot *et al.*, 2012; Lipka *et al.*, 2015). SVR had the worst  
561 performance with extremely high bias estimates.



562           Understanding the genetic architecture of agronomic traits can help improve  
563 predictions (Hayes *et al.*, 2010; Swami, 2010). Our study demonstrated that the effect size of  
564 QTL associated with a trait played a role in the performance of GS and MAS models. For  
565 instance, for traits controlled by both large and moderate effects loci (FTFILD, FTRILD,  
566 SSFISD, and SSRISD) parametric model with known loci as fixed effect (F<sub>x</sub>RRBLUP)  
567 followed by MAS outperformed the rest of the GS models (RRBLUP, RKHS, and SVR). The  
568 use of known QTL as fixed effects has been shown to increase prediction accuracy  
569 (Bernardo, 2014; Spindel *et al.*, 2016) in parametric GS models. For traits that were  
570 controlled by moderate effects loci (FTFISD, FTRISD, MFISD, and MTRISD), our results  
571 showed that the two parametric GS models (F<sub>x</sub>RRBLUP and RRBLUP) and semi-parametric  
572 (RKHS) had similar prediction accuracy, however F<sub>x</sub>RRBLUP had higher bias than  
573 RRBLUP and RKHS (Figure S12 - S13). Accuracy of prediction is influenced by genetic  
574 architecture (Hayes *et al.*, 2010). Furthermore, the performance of MAS in comparison to GS  
575 models in this study showed that large effects loci are important influencers of MAS  
576 (Bernardo, 2008). For small breeding programs in developing countries, MAS might be a  
577 prudent choice over GS for traits controlled only loci of large effects in cowpea since GS will  
578 require genotyping of more markers than MAS. The large effect QTL identified in this study  
579 can be transferred to different breeding populations because they were identified in a MAGIC  
580 population with wide genetic background (Chen *et al.*, 2018; Huynh *et al.*, 2018). Our study  
581 thus demonstrates that prior knowledge of the genetic architecture of a trait can help make  
582 informed decision about the best GEB method to employ in breeding.

### 583 **Experimental design considerations for GS in cowpea**

584           An important consideration in this study is to provide recommendations to breeders  
585 on resources needed for the implementation of GS in cowpea. First, this study demonstrated  
586 that genomic prediction within the same photoperiod is more efficient than across different  
587 photoperiod (Figure S14). Prediction between irrigation regimes had similar performance.  
588 The differences observed for GS between photoperiods showed that genotype x environment  
589 (GxE) interaction is an important factor to consider in cowpea flowering time GS. Increased  
590 genetic gains were observed in GS approaches that modeled GxE interactions (Lopez-Cruz *et al.*  
591 *et al.*, 2015; Crossa *et al.*, 2016; de Oliveira Couto *et al.*, 2017). Second, our results showed that  
592 the size of the training population had an effect on prediction accuracy as prediction accuracy  
593 increased with increase in training population size. The size of a training population is an  
594 important factor influencing prediction accuracy (Liu *et al.*, 2018) and studies have shown  
595 increase in prediction accuracy with increase in training population size in several crop

596 species (Albrecht *et al.*, 2011; Spindel *et al.*, 2015). Third, increase in marker density only  
597 significantly increased prediction between 20-60% for FLT\_BLUP and 40-60% and 60-80%  
598 for SS\_BLUP (Figure S19). Though these differences were significant, the mean prediction  
599 accuracy values were close to each other for all marker densities (Figure S19A). If using 20%  
600 of markers (6424 SNPs) gave similar prediction accuracy as 32,130 SNPs; then it might be  
601 more cost efficient for a breeder to use a small marker density. For instance, for flowering  
602 time, 6424 SNPs gave a mean prediction accuracy of 0.665 and 32130 SNPs gave a  
603 prediction accuracy of 0.671, then it might be logical and cost efficient to use ~6000 markers  
604 for GS.

605 In summary, to the best of our knowledge, this is the first study that will characterize  
606 epistasis and provide insights into the underpinnings of genomic selection *versus* marker  
607 assisted selection in cowpea. Our study identified both main QTL and two-way epistatic loci  
608 underlying flowering time, maturity, and seed size. We also found that flowering time is  
609 under the control of both large and moderate effect loci similar to findings in other inbreeding  
610 species. The large effect QTL and their colocalized *a priori* genes identified in this study will  
611 serve as pedestal for future studies aimed at the molecular characterization of the genes  
612 underlying flowering time and seed size in cowpea. We demonstrated that prior knowledge of  
613 the genetic architecture of a trait can help make informed decision in GEB. Together, our  
614 findings in this study are relevant for crop improvement in both developed and developing  
615 countries.

## 616 **Acknowledgement**

617 We express our gratitude to Prof. Timothy Close, Prof. Philip Roberts, Dr. Bao-Lam  
618 Huynh and their team at the University of California - Riverside, USA for their incredible  
619 contributions to cowpea genomics and the privilege to use the cowpea MAGIC population  
620 data for this study. The MAGIC population development, phenotyping, and genotyping was  
621 supported in large part by grants from the Generation Challenge Program of the Consultative  
622 Group on International Agricultural Research, with additional support from the USAID Feed  
623 the Future Innovation Lab for Collaborative Research on Grain Legumes (Cooperative  
624 Agreement EDH-A-00-07-00005), the USAID Feed the Future Innovation Lab for Climate  
625 Resilient Cowpea (Cooperative Agreement AID-OAA-A-13-00070), and NSF-BREAD  
626 (Advancing the Cowpea Genome for Food Security). We also thank Dr. Sandeep Marla, and  
627 Fanna Maina for helping with the manuscript review.

628 **Authors' contributions**

629 M.O.O. obtained data from UCR; concept by M.O.O and Z.H; M.O.O. and Z.H. analyzed the  
630 data; M.O.O, Z.H, and P.O.A wrote the manuscript. All authors read and approved the  
631 manuscript.

632 **Supporting information**

633 All the R scripts used for analyses in the study are available at:

634 <https://github.com/marcbios/Cowpea.git>

635

636

## 637 References

- 638 Albrecht, T., Wimmer, V., Auinger, H.-J., Erbe, M., Knaak, C., Ouzunova, M., Simianer, H.  
639 and Schön, C.-C. (2011) ‘Genome-based prediction of testcross values in maize’, *Theoretical*  
640 *and Applied Genetics*, 123(2), pp. 339–350. doi: 10.1007/s00122-011-1587-7.
- 641 Aukerman, M. J. and Sakai, H. (2003) ‘Regulation of flowering time and floral organ identity  
642 by a MicroRNA and its APETALA2-like target genes.’, *The Plant cell*. American Society of  
643 Plant Biologists, 15(11), pp. 2730–41. doi: 10.1105/tpc.016238.
- 644 Ben-Ari, G. and Lavi, U. (2012) ‘Marker-assisted selection in plant breeding’, in *Plant*  
645 *Biotechnology and Agriculture*. Elsevier, pp. 163–184. doi: 10.1016/B978-0-12-381466-  
646 1.00011-0.
- 647 Bernardo, R. (2008) ‘Molecular markers and selection for complex traits in plants: Learning  
648 from the last 20 years’, *Crop Science*. Crop Science Society of America, pp. 1649–1664. doi:  
649 10.2135/cropsci2008.03.0131.
- 650 Bernardo, R. (2014) ‘Genomewide Selection when Major Genes Are Known’, *Crop Science*.  
651 The Crop Science Society of America, Inc., 54(1), p. 68. doi: 10.2135/cropsci2013.05.0315.
- 652 Bernardo, R. and Yu, J. (2007) ‘Prospects for Genomewide Selection for Quantitative Traits  
653 in Maize’, *Crop Science*. Crop Science Society of America, 47(3), p. 1082. doi:  
654 10.2135/cropsci2006.11.0690.
- 655 Bouchet, S., Olatoye, M. O., Marla, S. R., Perumal, R., Tesso, T., Yu, J., Tuinstra, M. and  
656 Morris, G. P. (2017) ‘Increased power to dissect adaptive traits in global sorghum diversity  
657 using a nested association mapping population’, *Genetics*, 206(2), pp. 573–585. doi:  
658 10.1534/genetics.116.198499.
- 659 Boukar, O., Belko, N., Chamarthi, S., Togola, A., Batiemo, J., Owusu, E., Haruna, M., Diallo,  
660 S., Umar, M. L., Olufajo, O. and Fatokun, C. (2018) ‘Cowpea (*Vigna unguiculata*): Genetics,  
661 genomics and breeding’, *Plant Breeding*. Edited by C. Ojiewo, 9 May. doi:  
662 10.1111/pbr.12589.
- 663 Bradbury, P. J., Zhang, Z., Kroon, D. E., Casstevens, T. M., Ramdoss, Y. and Buckler, E. S.  
664 (2007) ‘TASSEL: software for association mapping of complex traits in diverse samples.’,  
665 *Bioinformatics (Oxford, England)*, 23(19), pp. 2633–5. doi: 10.1093/bioinformatics/btm308.
- 666 Brown, P. J., Upadyayula, N., Mahone, G. S., Tian, F., Bradbury, P. J., Myles, S., Holland, J.  
667 B., Flint-Garcia, S., McMullen, M. D., Buckler, E. S. and Rocheford, T. R. (2011) ‘Distinct  
668 genetic architectures for male and female inflorescence traits of maize’, *PLoS Genetics*.  
669 Public Library of Science, 7(11), p. e1002383. doi: 10.1371/journal.pgen.1002383.
- 670 Buckler, E. S., Holland, J. B., Bradbury, P. J., Acharya, C. B., Brown, P. J., Browne, C.,  
671 Ersoz, E., Flint-Garcia, S., Garcia, A., Glaubitz, J. C., Goodman, M. M., Harjes, C., Guill, K.,  
672 Kroon, D. E., Larsson, S., Lepak, N. K., Li, H., Mitchell, S. E., Pressoir, G., Peiffer, J. A.,  
673 Rosas, M. O., Rocheford, T. R., Romay, M. C., Romero, S., Salvo, S., Villeda, H. S., Da  
674 Silva, H. S., Sun, Q., Tian, F., Upadyayula, N., Ware, D., Yates, H., Yu, J., Zhang, Z.,  
675 Kresovich, S. and McMullen, M. D. (2009) ‘The genetic architecture of maize flowering  
676 time’, *Science*. American Association for the Advancement of Science, 325(5941), pp. 714–  
677 718. doi: 10.1126/science.1174276.
- 678 Cerrudo, D., Cao, S., Yuan, Y., Martinez, C., Suarez, E. A., Babu, R., Zhang, X. and  
679 Trachsel, S. (2018) ‘Genomic Selection Outperforms Marker Assisted Selection for Grain  
680 Yield and Physiological Traits in a Maize Doubled Haploid Population Across Water  
681 Treatments’, *Frontiers in Plant Science*. Frontiers Media SA, 9, p. 366. doi:  
682 10.3389/fpls.2018.00366.
- 683 Chen, A. H., Ge, W., Metcalf, W., Jakobsson, E., Mainzer, L. S. and Lipka, A. E. (2018) ‘An  
684 assessment of true and false positive detection rates of stepwise epistatic model selection as a  
685 function of sample size and number of markers’, *Heredity*, 15 November, p. 1. doi:  
686 10.1038/s41437-018-0162-2.
- 687 Chen, J., Alqudah, A. M., Hirotsu, N., Swamy, B. P. M., Iris, G., Descalsota, L., Mallikarjuna  
688 Swamy, B. P., Zaw, H., Ann Inabangan-Asilo, M., Amparado, A., Mauleon, R., Chadha-

- 689 Mohanty, P., Arocena, E. C., Raghavan, C., Leung, H., Hernandez, J. E., Lalusin, A. B.,  
690 Mendioro, M. S., Genaleen, M., Diaz, Q. and Reinke, R. (2018) ‘Genome-Wide Association  
691 Mapping in a Rice MAGIC Plus Population Detects QTLs and Genes Useful for  
692 Biofortification’. doi: 10.3389/fpls.2018.01347.
- 693 Chen, J., Li, X., Cheng, C., Wang, Y., Qin, M., Zhu, H., Zeng, R., Fu, X., Liu, Z. and Zhang,  
694 G. (2015) ‘Characterization of Epistatic Interaction of QTLs LH8 and EH3 Controlling  
695 Heading Date in Rice’, *Scientific Reports*. Nature Publishing Group, 4(1), p. 4263. doi:  
696 10.1038/srep04263.
- 697 Chen, M., Ahsan, A., Meng, X., Rahaman, M., Chen, H. and Monir, M. (2018) ‘Identification  
698 epistasis loci underlying rice flowering time by controlling population stratification and  
699 polygenic effect’, *DNA Research*. Edited by S. Isobe. doi: 10.1093/dnares/dsy043.
- 700 Covarrubias-pazaran, G. (2017) ‘Quick start for the sommer package’, pp. 1–12. Available at:  
701 <https://cran.r-project.org/web/packages/sommer/vignettes/sommer.start.pdf> (Accessed: 5  
702 March 2018).
- 703 Crossa, J., De Los Campos, G., Maccaferri, M., Tuberosa, R., Burgueño, J. and Pérez-  
704 Rodríguez, P. (2016) ‘Extending the marker × Environment interaction model for genomic-  
705 enabled prediction and genome-wide association analysis in durum wheat’, *Crop Science*,  
706 56(5), pp. 2193–2209. doi: 10.2135/cropsci2015.04.0260.
- 707 Daetwyler, H. D., Calus, M. P. L., Pong-Wong, R., de los Campos, G. and Hickey, J. M.  
708 (2013) ‘Genomic prediction in animals and plants: Simulation of data, validation, reporting,  
709 and benchmarking’, *Genetics*, pp. 347–365. doi: 10.1534/genetics.112.147983.
- 710 Durand, E., Bouchet, S., Bertin, P., Ressayre, A., Jamin, P., Charcosset, A., Dillmann, C. and  
711 Tenaillon, M. I. (2012) ‘Flowering Time in Maize: Linkage and Epistasis at a Major Effect  
712 Locus’, *Genetics*, 190(4), pp. 1547–1562. doi: 10.1534/genetics.111.136903.
- 713 Endelman, J. B. (2011) ‘Ridge Regression and Other Kernels for Genomic Selection with R  
714 Package rrBLUP’, *The Plant Genome Journal*. Crop Science Society of America, 4(3), p.  
715 250. doi: 10.3835/plantgenome2011.08.0024.
- 716 Fernandes, S. B., Dias, K. O. G., Ferreira, D. F. and Brown, P. J. (2018) ‘Efficiency of multi-  
717 trait, indirect, and trait-assisted genomic selection for improvement of biomass sorghum’,  
718 *Theoretical and Applied Genetics*. Springer Berlin Heidelberg, 131(3), pp. 747–755. doi:  
719 10.1007/s00122-017-3033-y.
- 720 Foolad, M. R. and Panthee, D. R. (2012) ‘Marker-Assisted Selection in Tomato Breeding’,  
721 *Critical Reviews in Plant Sciences*. Taylor & Francis Group , 31(2), pp. 93–123. doi:  
722 10.1080/07352689.2011.616057.
- 723 Gianola, D., Fernando, R. L. and Stella, A. (2006) ‘Genomic-Assisted Prediction of Genetic  
724 Value with Semiparametric Procedures’, *Genetics*. Genetics, 173(3), pp. 1761–1776. doi:  
725 10.1534/genetics.105.049510.
- 726 Gianola, D. and Van Kaam, J. B. C. H. M. (2008) ‘Reproducing kernel Hilbert spaces  
727 regression methods for genomic assisted prediction of quantitative traits’, *Genetics*. Genetics,  
728 178(4), pp. 2289–2303. doi: 10.1534/genetics.107.084285.
- 729 Gianola, D. and de los Campos, G. (2008) ‘Inferring genetic values for quantitative traits  
730 non-parametrically’, *Genetics Research*. Cambridge University Press, 90(6), pp. 525–540.  
731 doi: 10.1017/S0016672308009890.
- 732 Goodstein, D. M., Shu, S., Howson, R., Neupane, R., Hayes, R. D., Fazo, J., Mitros, T.,  
733 Dirks, W., Hellsten, U., Putnam, N. and Rokhsar, D. S. (2012) ‘Phytozome: a comparative  
734 platform for green plant genomics.’, *Nucleic acids research*. Oxford University Press,  
735 40(Database issue), pp. D1178-86. doi: 10.1093/nar/gkr944.
- 736 Gota, M. and Gianola, D. (2014) ‘Kernel-based whole-genome prediction of complex traits:  
737 A review’, *Frontiers in Genetics*, 5(OCT), pp. 1–13. doi: 10.3389/fgene.2014.00363.
- 738 H.Barton, N. and D.Keightley (2002) ‘UNDERSTANDING QUANTITATIVE GENETIC  
739 VARIATION’, *Nature Reviews Genetics*, 3, pp. 11–21. doi: 10.1038/nrg700.
- 740 Hall, A. E. (2004) ‘Breeding for adaptation to drought and heat in cowpea’, *European*



- 741 *Journal of Agronomy*, 21(4), pp. 447–454. doi: 10.1016/j.eja.2004.07.005.
- 742 Hall, A. E., Cisse, N., Thiaw, S., Elawad, H. O. A., Ehlers, J. D., Ismail, A. M., Fery, R. L.,
- 743 Roberts, P. A., Kitch, L. W., Murdock, L. L., Boukar, O., Phillips, R. D. and McWatters, K.
- 744 H. (2003) ‘Development of cowpea cultivars and germplasm by the Bean/Cowpea CRSP’,
- 745 *Field Crops Research*, 82(2–3), pp. 103–134. doi: 10.1016/S0378-4290(03)00033-9.
- 746 Hayes, B. J., Pryce, J., Chamberlain, A. J., Bowman, P. J. and Goddard, M. E. (2010)
- 747 ‘Genetic Architecture of Complex Traits and Accuracy of Genomic Prediction: Coat Colour,
- 748 Milk-Fat Percentage, and Type in Holstein Cattle as Contrasting Model Traits’, *PLoS*
- 749 *Genetics*. Edited by M. Georges. Public Library of Science, 6(9), p. e1001139. doi:
- 750 10.1371/journal.pgen.1001139.
- 751 Hazen, S. P., Schultz, T. F., Pruneda-Paz, J. L., Borevitz, J. O., Ecker, J. R. and Kay, S. A.
- 752 (2005) ‘LUX ARRHYTHMO encodes a Myb domain protein essential for circadian
- 753 rhythms.’, *Proceedings of the National Academy of Sciences of the United States of America*.
- 754 National Academy of Sciences, 102(29), pp. 10387–92. doi: 10.1073/pnas.0503029102.
- 755 Heslot, N., Yang, H. P., Sorrells, M. E. and Jannink, J. L. (2012) ‘Genomic selection in plant
- 756 breeding: A comparison of models’, *Crop Science*. The Crop Science Society of America,
- 757 Inc., 52(1), pp. 146–160. doi: 10.2135/cropsci2011.06.0297.
- 758 Howard, R. (2016) ‘Evaluation of Parametric and Nonparametric Statistical Methods in
- 759 Genomic Prediction’, *Graduate Theses and Dissertations*. Available at:
- 760 <https://lib.dr.iastate.edu/etd/15720> (Accessed: 10 April 2018).
- 761 Howard, R., Carriquiry, A. L. and Beavis, W. D. (2014) ‘Parametric and Nonparametric
- 762 Statistical Methods for Genomic Selection of Traits with Additive and Epistatic Genetic
- 763 Architectures’, *G3&#58; Genes|Genomes|Genetics*, 4(6), pp. 1027–1046. doi:
- 764 10.1534/g3.114.010298.
- 765 Huang, P., Jiang, H., Zhu, C., Barry, K., Jenkins, J., Sandor, L., Schmutz, J., Box, M. S.,
- 766 Kellogg, E. A. and Brutnell, T. P. (2017) ‘Sparse panicle1 is required for inflorescence
- 767 development in *Setaria viridis* and maize’, *Nature Plants*, 3(5), p. 17054. doi:
- 768 10.1038/nplants.2017.54.
- 769 Huang, X., Ding, J., Effgen, S., Turck, F. and Koornneef, M. (2013) ‘Multiple loci and
- 770 genetic interactions involving flowering time genes regulate stem branching among natural
- 771 variants of *Arabidopsis*’, *New Phytologist*, 199, pp. 843–857. doi: 10.1111/nph.12306.
- 772 Huynh, B. L., Ehlers, J. D., Huang, B. E., Muñoz-Amatriaín, M., Lonardi, S., Santos, J. R. P.,
- 773 Ndeve, A., Batieno, B. J., Boukar, O., Cisse, N., Drabo, I., Fatokun, C., Kusi, F., Agyare, R.
- 774 Y., Guo, Y. N., Herniter, I., Lo, S., Wanamaker, S. I., Xu, S., Close, T. J. and Roberts, P. A.
- 775 (2018) ‘A multi-parent advanced generation inter-cross (MAGIC) population for genetic
- 776 analysis and improvement of cowpea (*Vigna unguiculata* L. Walp.)’, *Plant Journal*.
- 777 Wiley/Blackwell (10.1111), 93(6), pp. 1129–1142. doi: 10.1111/tpj.13827.
- 778 Jacquin, L., Cao, T.-V. and Ahmadi, N. (2016) ‘A Unified and Comprehensible View of
- 779 Parametric and Kernel Methods for Genomic Prediction with Application to Rice’, *Frontiers*
- 780 *in Genetics*. Frontiers, 7, p. 145. doi: 10.3389/fgene.2016.00145.
- 781 Jannink, J. L., Lorenz, A. J. and Iwata, H. (2010) ‘Genomic selection in plant breeding: From
- 782 theory to practice’, *Briefings in Functional Genomics and Proteomics*. Oxford University
- 783 Press, 9(2), pp. 166–177. doi: 10.1093/bfgp/elq001.
- 784 Jarquin, D., Specht, J. and Lorenz, A. (2016) ‘Prospects of Genomic Prediction in the USDA
- 785 Soybean Germplasm Collection: Historical Data Creates Robust Models for Enhancing
- 786 Selection of Accessions’, *G3&#58; Genes|Genomes|Genetics*. G3: Genes, Genomes,
- 787 Genetics, 6(8), pp. 2329–2341. doi: 10.1534/g3.116.031443.
- 788 Jiang, Y. and Reif, J. C. (2015) *Modeling Epistasis in Genomic Selection*. Available at:
- 789 [www.genetics.org/lookup/suppl/](http://www.genetics.org/lookup/suppl/) (Accessed: 27 July 2018).
- 790 Johnson, N. (2008) ‘Sewall Wright and the Development of Shifting Balance Theory’,
- 791 *Nature Education*, 1(1), p. 52. doi: 10.1093/rfs/hhx028.
- 792 Juenger, T. E., Sen, S., Stowe, K. A. and Simms, E. L. (2005) ‘Epistasis and genotype-

- 793 environment interaction for quantitative trait loci affecting flowering time in *Arabidopsis*  
794 *thaliana*', in *Genetics of Adaptation*. Berlin/Heidelberg: Springer-Verlag, pp. 87–105. doi:  
795 10.1007/1-4020-3836-4\_9.
- 796 Karatzoglou, A., Smola, A., Hornik, K. and Zeileis, A. (2004) 'kernlab - An S4 Package for  
797 Kernel Methods in R', *Journal of Statistical Software*, 11(9), pp. 1–20. doi:  
798 10.18637/jss.v011.i09.
- 799 King, E. G. and Long, A. D. (2017) 'The Beavis Effect in Next-Generation Mapping Panels  
800 in *Drosophila melanogaster*.', *G3 (Bethesda, Md.)*. G3: Genes, Genomes, Genetics, 7(6), pp.  
801 1643–1652. doi: 10.1534/g3.117.041426.
- 802 Komeda, Y. (2004) 'GENETIC REGULATION OF TIME TO FLOWER IN  
803 ARABIDOPSIS THALIANA', *Annu. Rev. Plant Biol.*, 55, pp. 521–556. doi:  
804 10.1146/annurev.arplant.55.031903.141644.
- 805 Kurek, A. (2018) *Phenotypic and genomic selection for multi-trait improvement in soybean*  
806 *line and variety development*. Iowa State University. Available at:  
807 <https://lib.dr.iastate.edu/etd> (Accessed: 4 February 2019).
- 808 Langyintuo, A. S., Lowenberg-DeBoer, J., Faye, M., Lambert, D., Ibro, G., Moussa, B.,  
809 Kergna, A., Kushwaha, S., Musa, S. and Ntougam, G. (2003) 'Cowpea supply and demand in  
810 West and Central Africa', *Field Crops Research*. Elsevier, 82(2–3), pp. 215–231. doi:  
811 10.1016/S0378-4290(03)00039-X.
- 812 Li, X., Guo, T., Mu, Q., Li, X. and Yu, J. (2018) 'Genomic and environmental determinants  
813 and their interplay underlying phenotypic plasticity', *Proceedings of the National Academy of*  
814 *Sciences*, 115(26), pp. 6679–6684. doi: 10.1073/pnas.1718326115.
- 815 Lin, C. (2002) 'Photoreceptors and Regulation of Flowering Time', *Plant Physiology*, 123(1),  
816 pp. 39–50. doi: 10.1104/pp.123.1.39.
- 817 Lin, Y.-R., Schertz, K. F. and Paterson, A. H. (1995) 'Comparative Analysis of QTLs  
818 Affecting Plant Height and Maturity Across the Poaceae, in Reference to an Interspecific  
819 Sorghum Population', *Genetics*, 141, pp. 391–411. Available at:  
820 <http://www.genetics.org/content/genetics/141/1/391.full.pdf> (Accessed: 13 October 2017).
- 821 Lipka, A. E., Kandianis, C. B., Hudson, M. E., Yu, J., Drnevich, J., Bradbury, P. J. and Gore,  
822 M. A. (2015) 'From association to prediction: statistical methods for the dissection and  
823 selection of complex traits in plants', *Current Opinion in Plant Biology*, 24, pp. 110–118.  
824 doi: 10.1016/j.pbi.2015.02.010.
- 825 Liu, C., Teo, Z. W. N., Bi, Y., Song, S., Xi, W., Yang, X., Yin, Z. and Yu, H. (2013) 'A  
826 Conserved Genetic Pathway Determines Inflorescence Architecture in *Arabidopsis* and Rice',  
827 *Developmental Cell*, 24(6), pp. 612–622. doi: 10.1016/j.devcel.2013.02.013.
- 828 Liu, X., Wang, H., Wang, H., Guo, Z., Xu, X., Liu, J., Wang, S., Li, W.-X., Zou, C.,  
829 Prasanna, B. M., Olsen, M. S., Huang, C. and Xu, Y. (2018) 'Factors affecting genomic  
830 selection revealed by empirical evidence in maize', *The Crop Journal*. Elsevier, 6(4), pp.  
831 341–352. doi: 10.1016/J.CJ.2018.03.005.
- 832 Long, N., Gianola, D., Rosa, G. J. M. and Weigel, K. A. (2011) 'Application of support  
833 vector regression to genome-assisted prediction of quantitative traits', *Theoretical and*  
834 *Applied Genetics*, 123(7), pp. 1065–1074. doi: 10.1007/s00122-011-1648-y.
- 835 Lopez-Cruz, M., Crossa, J., Bonnett, D., Dreisigacker, S., Poland, J., Jannink, J.-L., Singh, R.  
836 P., Autrique, E. and de los Campos, G. (2015) 'Increased prediction accuracy in wheat  
837 breeding trials using a marker × environment interaction genomic selection model.', *G3*  
838 *(Bethesda, Md.)*, 5(4), pp. 569–82. doi: 10.1534/g3.114.016097.
- 839 De Los Campos, G., Gianola, D., Rosa, G. J. M., Weigel, K. A. and Crossa, J. (2010) 'Semi-  
840 parametric genomic-enabled prediction of genetic values using reproducing kernel Hilbert  
841 spaces methods', *Genetics Research*. Cambridge University Press, 92(4), pp. 295–308. doi:  
842 10.1017/S0016672310000285.
- 843 Mackay, T. F. C. (2001) 'The Genetic Architecture of Quantitative Traits', *Annual Review of*  
844 *Genetics*, 35(1), pp. 303–339. doi: 10.1146/annurev.genet.35.102401.090633.



- 845 Maenhout, S., De Baets, B., Haesaert, G. and Van Bockstaele, E. (2007) ‘Support vector  
846 machine regression for the prediction of maize hybrid performance’, *Theoretical and Applied*  
847 *Genetics*, 115(7), pp. 1003–1013. doi: 10.1007/s00122-007-0627-9.
- 848 Massman, J. M., Jung, H.-J. G. and Bernardo, R. (2013) ‘Genomewide Selection versus  
849 Marker-assisted Recurrent Selection to Improve Grain Yield and Stover-quality Traits for  
850 Cellulosic Ethanol in Maize’, *Crop Science*. The Crop Science Society of America, Inc.,  
851 53(1), p. 58. doi: 10.2135/cropsci2012.02.0112.
- 852 Matei, G., Woyann, L. G., Milioli, A. S., de Bem Oliveira, I., Zdziarski, A. D., Zanella, R.,  
853 Coelho, A. S. G., Finatto, T. and Benin, G. (2018) ‘Genomic selection in soybean: accuracy  
854 and time gain in relation to phenotypic selection’, *Molecular Breeding*. Springer Netherlands,  
855 38(9), p. 117. doi: 10.1007/s11032-018-0872-4.
- 856 Mathew, B., Léon, J., Sannemann, W. and Sillanpää, M. J. (2018) ‘Detection of epistasis for  
857 flowering time using bayesian multilocus estimation in a barley MAGIC population’,  
858 *Genetics*. Genetics, 208(2), pp. 525–536. doi: 10.1534/genetics.117.300546.
- 859 Mathieu, J., Yant, L. J., Mürdter, F., Küttner, F. and Schmid, M. (2009) ‘Repression of  
860 Flowering by the miR172 Target SMZ’, *PLoS Biology*. Edited by C. Dean. Public Library of  
861 Science, 7(7), p. e1000148. doi: 10.1371/journal.pbio.1000148.
- 862 Maurer, A., Draba, V., Jiang, Y., Schnaithmann, F., Sharma, R., Schumann, E., Kilian, B.,  
863 Reif, J. C. and Pillen, K. (2015) ‘Modelling the genetic architecture of flowering time control  
864 in barley through nested association mapping.’, *BMC genomics*. ???, 16(1), p. 290. doi:  
865 10.1186/s12864-015-1459-7.
- 866 Melchinger, A. E., Utz, H. F., Piepho, H. P., Zeng, Z. B. and Schön, C. C. (2007) ‘The role of  
867 epistasis in the manifestation of heterosis: A systems-oriented approach’, *Genetics*. Genetics  
868 Society of America, 177(3), pp. 1815–1825. doi: 10.1534/genetics.107.077537.
- 869 Messina, C. D., Podlich, D., Dong, Z., Samples, M. and Cooper, M. (2011) ‘Yield-trait  
870 performance landscapes: From theory to application in breeding maize for drought tolerance’,  
871 *Journal of Experimental Botany*. Oxford University Press, pp. 855–868. doi:  
872 10.1093/jxb/erq329.
- 873 Meuwissen, T. H. E., Hayes, B. J. and Goddard, M. E. (2001) ‘Prediction of total genetic  
874 value using genome-wide dense marker maps’, *Genetics*, 157(4), pp. 1819–1829. doi:  
875 11290733.
- 876 Mohamed, A., Ali, R., Elhassan, O., Suliman, E., Mugoya, C., Masiga, C. W., Elhusien, A.  
877 and Hash, C. T. (2014) ‘First products of DNA marker-assisted selection in sorghum released  
878 for cultivation by farmers in sub-saharan Africa’, *Journal of Plant Science and Molecular*  
879 *Breeding*. Herbert Publications, 3(1), p. 3. doi: 10.7243/2050-2389-3-3.
- 880 Moore, J. H. and Williams, S. M. (2009) ‘Epistasis and its implications for personal  
881 genetics.’, *American journal of human genetics*. Elsevier, 85(3), pp. 309–20. doi:  
882 10.1016/j.ajhg.2009.08.006.
- 883 Muchero, W., Diop, N. N., Bhat, P. R., Fenton, R. D., Wanamaker, S., Pottorff, M., Hearne,  
884 S., Cisse, N., Fatokun, C., Ehlers, J. D., Roberts, P. A. and Close, T. J. (2009) ‘A consensus  
885 genetic map of cowpea [*Vigna unguiculata* (L) Walp.] and synteny based on EST-derived  
886 SNPs.’, *Proceedings of the National Academy of Sciences of the United States of America*,  
887 106(43), pp. 18159–64. doi: 10.1073/pnas.0905886106.
- 888 Okogbenin, E., Porto, M. C. M., Egesi, C., Mba, C., Espinosa, E., Santos, L. G., Ospina, C.,  
889 Mar??n, J., Barrera, E., Guti??rez, J., Ekanayake, I., Iglesias, C. and Fregene, M. A. (2007)  
890 ‘Marker-assisted introgression of resistance to cassava mosaic disease into latin American  
891 germplasm for the genetic improvement of cassava in Africa’, *Crop Science*, 47(5), pp.  
892 1895–1904. doi: 10.2135/cropsci2006.10.0688.
- 893 de Oliveira Couto, E. G., Bandeira e Sousa, M., Jarquín, D., Burgueño, J., Crossa, J.,  
894 Fritsche-Neto, R., Pérez-Rodríguez, P. and Cuevas, J. (2017) ‘Genomic-Enabled Prediction  
895 in Maize Using Kernel Models with Genotype × Environment Interaction’, *G3&#58;*  
896 *Genes|Genomes|Genetics*, 7(6), pp. 1995–2014. doi: 10.1534/g3.117.042341.

- 897 Orozco-Arroyo, G., Paolo, D., Ezquer, I. and Colombo, L. (2015) ‘Networks controlling seed  
898 size in Arabidopsis’, *Plant Reproduction*. Springer Berlin Heidelberg, 28(1), pp. 17–32. doi:  
899 10.1007/s00497-015-0255-5.
- 900 Pan, Y. B., Tew, T. L., Schnell, R. J., Viator, R. P., Richard, E. P., Grisham, M. P. and White,  
901 W. H. (2006) ‘Microsatellite DNA marker-assisted selection of *Saccharum spontaneum*  
902 cytoplasm-derived germplasm’, *Sugar Tech*. Springer India, 8(1), pp. 23–29. doi:  
903 10.1007/BF02943737.
- 904 Peiffer, J. A., Romay, M. C., Gore, M. A., Flint-Garcia, S. A., Zhang, Z., Millard, M. J.,  
905 Gardner, C. A. C., McMullen, M. D., Holland, J. B., Bradbury, P. J. and Buckler, E. S.  
906 (2014) ‘The genetic architecture of maize height’, *Genetics*, 196(4), pp. 1337–1356. doi:  
907 10.1534/genetics.113.159152.
- 908 Perez, P. (2014) ‘BGLR : A Statistical Package for Whole Genome Regression and  
909 Prediction’, *Genetics*, 198(2), pp. 483–495. doi: 10.1534/genetics.114.164442.
- 910 Rieseberg, L. H., Archer, M. A. and Wayne, R. K. (1999) ‘Transgressive segregation,  
911 adaptation and speciation’, *Heredity*. Nature Publishing Group, 83(4), pp. 363–372. doi:  
912 10.1038/sj.hdy.6886170.
- 913 Saghai Maroof, M. A., Jeong, S. C., Gunduz, I., Tucker, D. M., Buss, G. R. and Tolin, S. A.  
914 (2008) ‘Pyramiding of Soybean Mosaic Virus Resistance Genes by Marker-Assisted  
915 Selection’, *Crop Science*. Crop Science Society of America, 48(2), p. 517. doi:  
916 10.2135/cropsci2007.08.0479.
- 917 Sasaki, E., Frommlet, F. and Nordborg, M. (2017) ‘The genetic architecture of the network  
918 underlying flowering time variation in *Arabidopsis thaliana*’. doi:  
919 10.1534/genetics.XXX.XXXXXX.
- 920 Schneider, K. A., Brothers, M. E. and Kelly, J. D. (1997) ‘Marker-Assisted Selection to  
921 Improve Drought Resistance in Common Bean’, *Crop Science*. Crop Science Society of  
922 America, 37(1), p. 51. doi: 10.2135/cropsci1997.0011183X003700010008x.
- 923 Somers, D. E., Schultz, T. F., Milnamow, M. and Kay, S. A. (2000) ‘ZEITLUPE encodes a  
924 novel clock-associated PAS protein from *Arabidopsis*.’, *Cell*. Elsevier, 101(3), pp. 319–29.  
925 doi: 10.1016/S0092-8674(00)80841-7.
- 926 Spindel, J., Begum, H., Akdemir, D., Collard, B., Redoña, E., Jannink, J.-L. and McCouch, S.  
927 (2016) ‘Genome-wide prediction models that incorporate de novo GWAS are a powerful new  
928 tool for tropical rice improvement’, *Heredity*, 116, pp. 395–408. doi: 10.1038/hdy.2015.113.
- 929 Spindel, J., Begum, H., Akdemir, D., Virk, P., Collard, B., Redoña, E., Atlin, G., Jannink, J.  
930 L. and McCouch, S. R. (2015) ‘Genomic Selection and Association Mapping in Rice (*Oryza*  
931 *sativa*): Effect of Trait Genetic Architecture, Training Population Composition, Marker  
932 Number and Statistical Model on Accuracy of Rice Genomic Selection in Elite, Tropical Rice  
933 Breeding Lines’, *PLoS Genetics*. Edited by R. Mauricio. Public Library of Science, 11(2), pp.  
934 1–25. doi: 10.1371/journal.pgen.1004982.
- 935 Sun, X., Ma, P. and Mumm, R. H. (2012) ‘Nonparametric Method for Genomics-Based  
936 Prediction of Performance of Quantitative Traits Involving Epistasis in Plant Breeding’,  
937 *PLoS ONE*. Edited by X. Wang. Public Library of Science, 7(11), p. e50604. doi:  
938 10.1371/journal.pone.0050604.
- 939 Swami, M. (2010) ‘Using genetic architecture to improve predictions’, *Nature Reviews*  
940 *Genetics*, 11(11), pp. 748–748. doi: 10.1038/nrg2888.
- 941 Tardivel, A., Sonah, H., Belzile, F. and O’Donoghue, L. S. (2014) ‘Rapid Identification of  
942 Alleles at the Soybean Maturity Gene E3 using genotyping by Sequencing and a Haplotype-  
943 Based Approach’, *The Plant Genome*, 7(2), p. 0. doi: 10.3835/plantgenome2013.10.0034.
- 944 Utz, H. F., Melchinger, A. E. and Schön, C. C. (2000) ‘Bias and sampling error of the  
945 estimated proportion of genotypic variance explained by quantitative trait loci determined  
946 from experimental data in maize using cross validation and validation with independent  
947 samples’, *Genetics*, 154(4), pp. 1839–1849. doi: 10.2307/1403680.
- 948 Vapnik, V. N. (1995) *The Nature of Statistical Learning Theory*. 1st edn. Edited by V. N.

- 949 Michael Jordan, Steffen L. Lauritzen, Jerald F. Lawless. New York: Springer. doi:  
950 10.1007/978-1-4757-3264-1.
- 951 Varshney, R. K., Ribaut, J. M., Buckler, E. S., Tuberosa, R., Rafalski, A. J. and Langridge, P.  
952 (2012) ‘Can genomics boost productivity of orphan crops?’, *Nature Biotechnology*, 30(12),  
953 pp. 1172–1176. doi: 10.1038/nbt.2440.
- 954 Volis, S., Shulgina, I., Zaretsky, M. and Koren, O. (2010) ‘Epistasis in natural populations of  
955 a predominantly selfing plant’, *Heredity*, 106, pp. 300–309. doi: 10.1038/hdy.2010.79.
- 956 Wen, L., Chang, H.-X., Brown, P. J., Domier, L. L. and Hartman, G. L. (2019) ‘Genome-  
957 wide association and genomic prediction identifies soybean cyst nematode resistance in  
958 common bean including a syntenic region to soybean Rhg1 locus’, *Horticulture Research*.  
959 Nature Publishing Group, 6(1), p. 9. doi: 10.1038/s41438-018-0085-3.
- 960 Wenkel, S., Turck, F., Singer, K., Gissot, L., Gourrierc, J. Le, Samach, A. and Coupland, G.  
961 (2006) ‘The Plant Cell Online’, *Plant Cell*. American Society of Plant Biologists, 12(12), pp.  
962 2473–2484. doi: 10.1105/tpc.12.12.2473.
- 963 Wong, C. K. and Bernardo, R. (2008) ‘Genomewide selection in oil palm: increasing  
964 selection gain per unit time and cost with small populations’, *Theoretical and Applied  
965 Genetics*. Springer-Verlag, 116(6), pp. 815–824. doi: 10.1007/s00122-008-0715-5.
- 966 Xu, S. (2003) ‘Theoretical Basis of the Beavis Effect’, *Genetics*, 165(4), pp. 2259–2268.  
967 Available at: <http://www.genetics.org/content/genetics/165/4/2259.full.pdf> (Accessed: 15  
968 November 2017).
- 969 Xu, Y., Li, P., Yang, Z. and Xu, C. (2017) ‘Genetic mapping of quantitative trait loci in  
970 crops’, *The Crop Journal*. Elsevier, 5(2), pp. 175–184. doi: 10.1016/J.CJ.2016.06.003.
- 971 Yu, J., Pressoir, G., Briggs, W. H., Vroh Bi, I., Yamasaki, M., Doebley, J. F., McMullen, M.  
972 D., Gaut, B. S., Nielsen, D. M., Holland, J. B., Kresovich, S. and Buckler, E. S. (2006) ‘A  
973 unified mixed-model method for association mapping that accounts for multiple levels of  
974 relatedness’, *Nature Genetics*. Nature Publishing Group, 38(2), pp. 203–208. doi:  
975 10.1038/ng1702.
- 976 Yu, K., Park, S. J. and Poysa, V. (2000) ‘Marker-assisted selection of common beans for  
977 resistance to common bacterial blight: efficacy and economics’, *Plant Breeding*. John Wiley  
978 & Sons, Ltd (10.1111), 119(5), pp. 411–415. doi: 10.1046/j.1439-0523.2000.00514.x.
- 979 Zhang, T., Yuan, Y., Yu, J., Guo, W. and Kohel, R. J. (2003) ‘Molecular tagging of a major  
980 QTL for fiber strength in Upland cotton and its marker-assisted selection’, *Theoretical and  
981 Applied Genetics*. Springer-Verlag, 106(2), pp. 262–268. doi: 10.1007/s00122-002-1101-3.
- 982 Zhao, Y., Mette, M. F., Gowda, M., Longin, C. F. H. and Reif, J. C. (2014) ‘Bridging the gap  
983 between marker-assisted and genomic selection of heading time and plant height in hybrid  
984 wheat’, *Heredity*, 112(6), pp. 638–645. doi: 10.1038/hdy.2014.1.
- 985

986 **Tables**

987 **Supplementary figures**

988

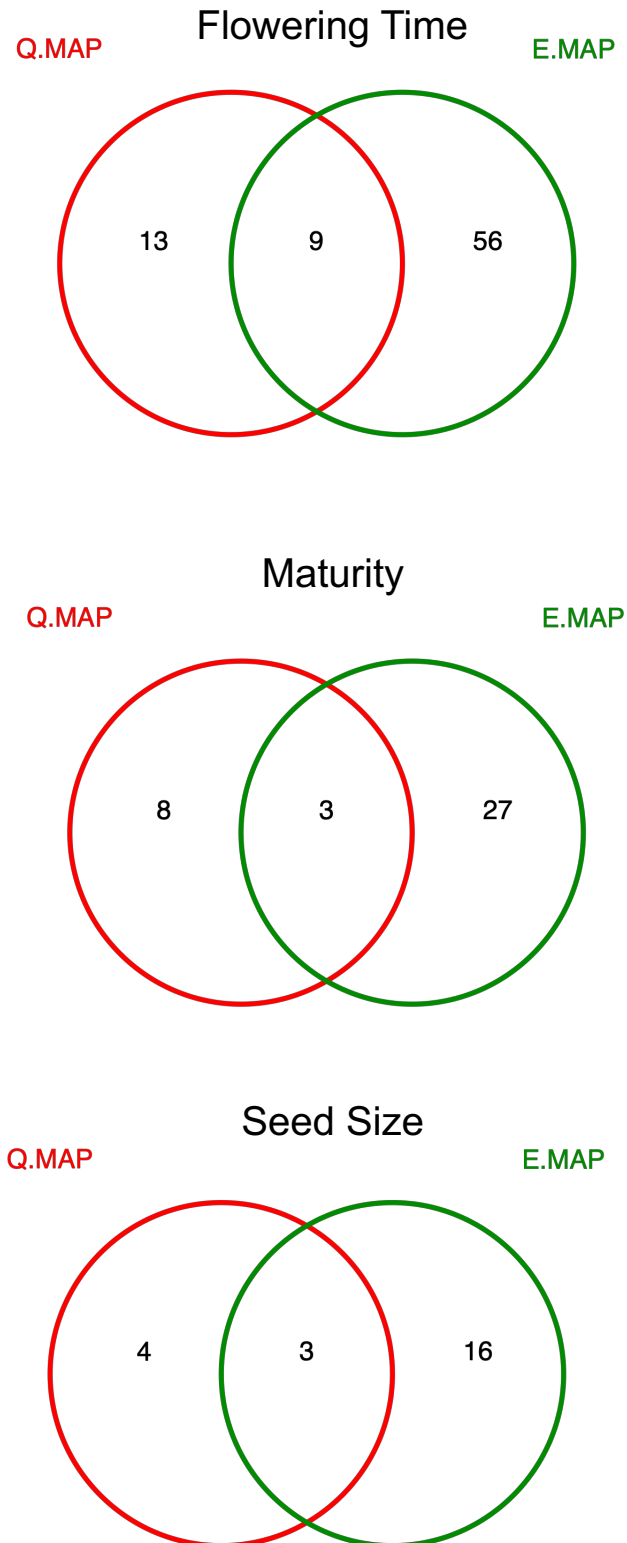

989

990

991

**Figure S 1: Venn diagram of QTL overlap between main effect QTL mapping (Q.MAP) and epistasis mapping (E.MAP) for flowering time, maturity, and seed size.**

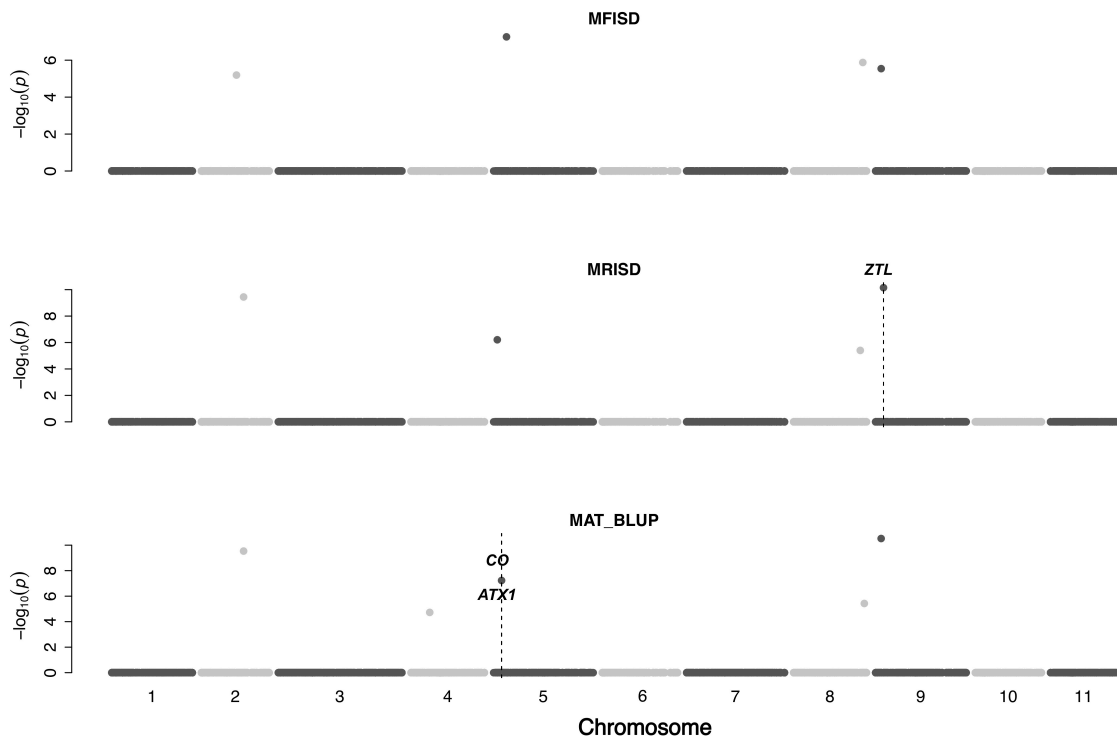

992  
993  
994  
995  
996  
997  
998

**Figure S 2: QTL plot for maturity traits in the cowpea MAGIC population.** QTL plots for maturity under full irrigation and short day (MFISD), maturity under restricted irrigation and short day (MRISD), and BLUPs of environments (MAT\_BLUP). The chromosome numbers are located on the x-axis and the negative log of the  $P$ -values on the y-axis. The genetic position of the colocalization between QTL and *a priori* genes are indicated by broken vertical lines. The texts displayed on the vertical broken lines are the names of *a priori* genes.

999

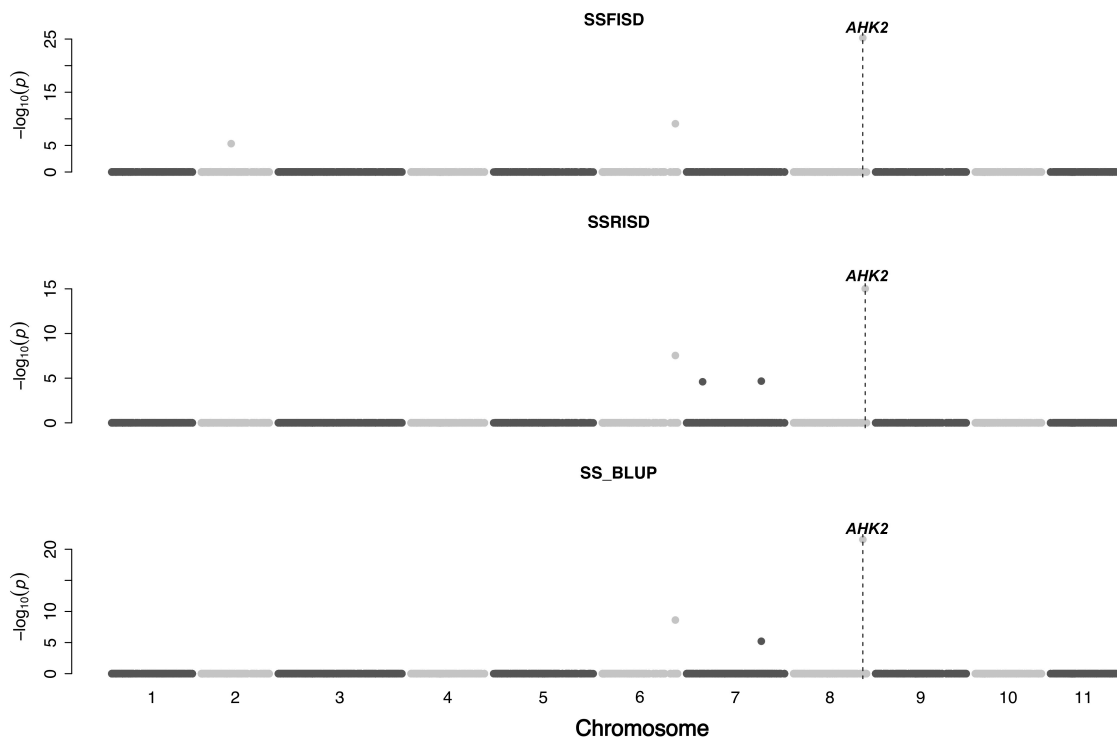

1000  
1001  
1002  
1003

**Figure S 3: QTL plot for seed size traits in the cowpea MAGIC population.** QTL plots for maturity under full irrigation and short day (SSFISD), maturity under restricted irrigation and short day (SSRISD), and BLUPs of environments (SS\_BLUP). The chromosome numbers are located on the x-axis and the

1004 negative log of the  $P$ -values on the y-axis. The genetic position of the colocalization between QTL and  $a$   
1005 *priori* genes are indicated by broken vertical lines. The texts displayed on the vertical broken lines are the  
1006 names of  $a$  *priori* genes.

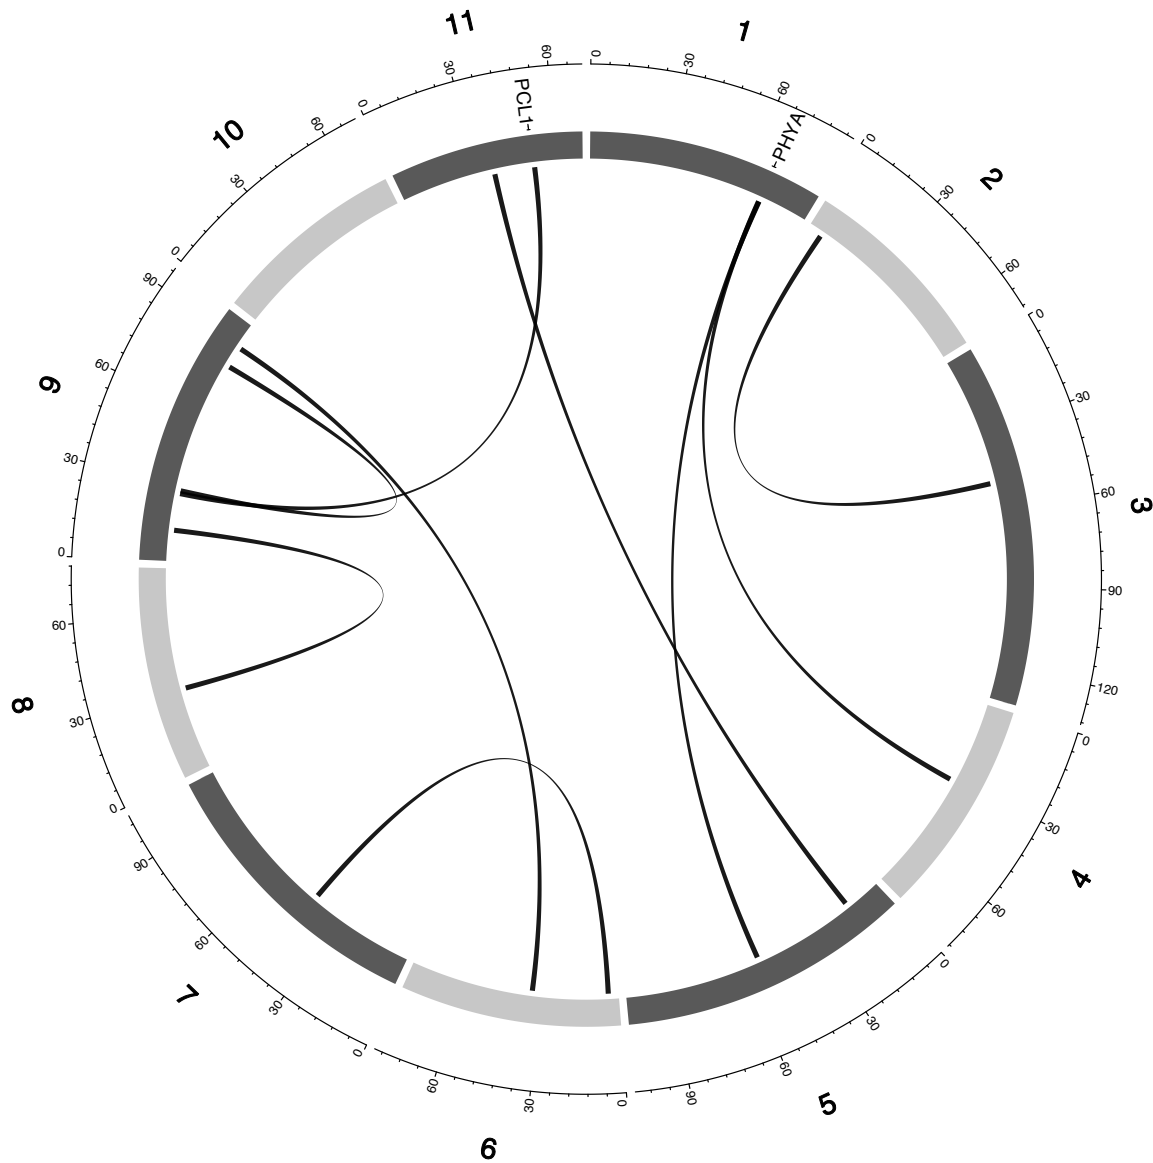

1007 **Figure S 4: Genetic map of the cowpea multiparent advanced generation inter-cross population (MAGIC)**  
1008 **with pairwise interactions between epistatic QTL for FTFILD (Flowering time under full irrigation and**  
1009 **long day).** Chromosomes are shown in shades of gray, two-way interacting loci are connected with black solid  
1010 lines, and colocalized  $a$  *priori* genes are texts between chromosomes and genetic map.  
1011

1012



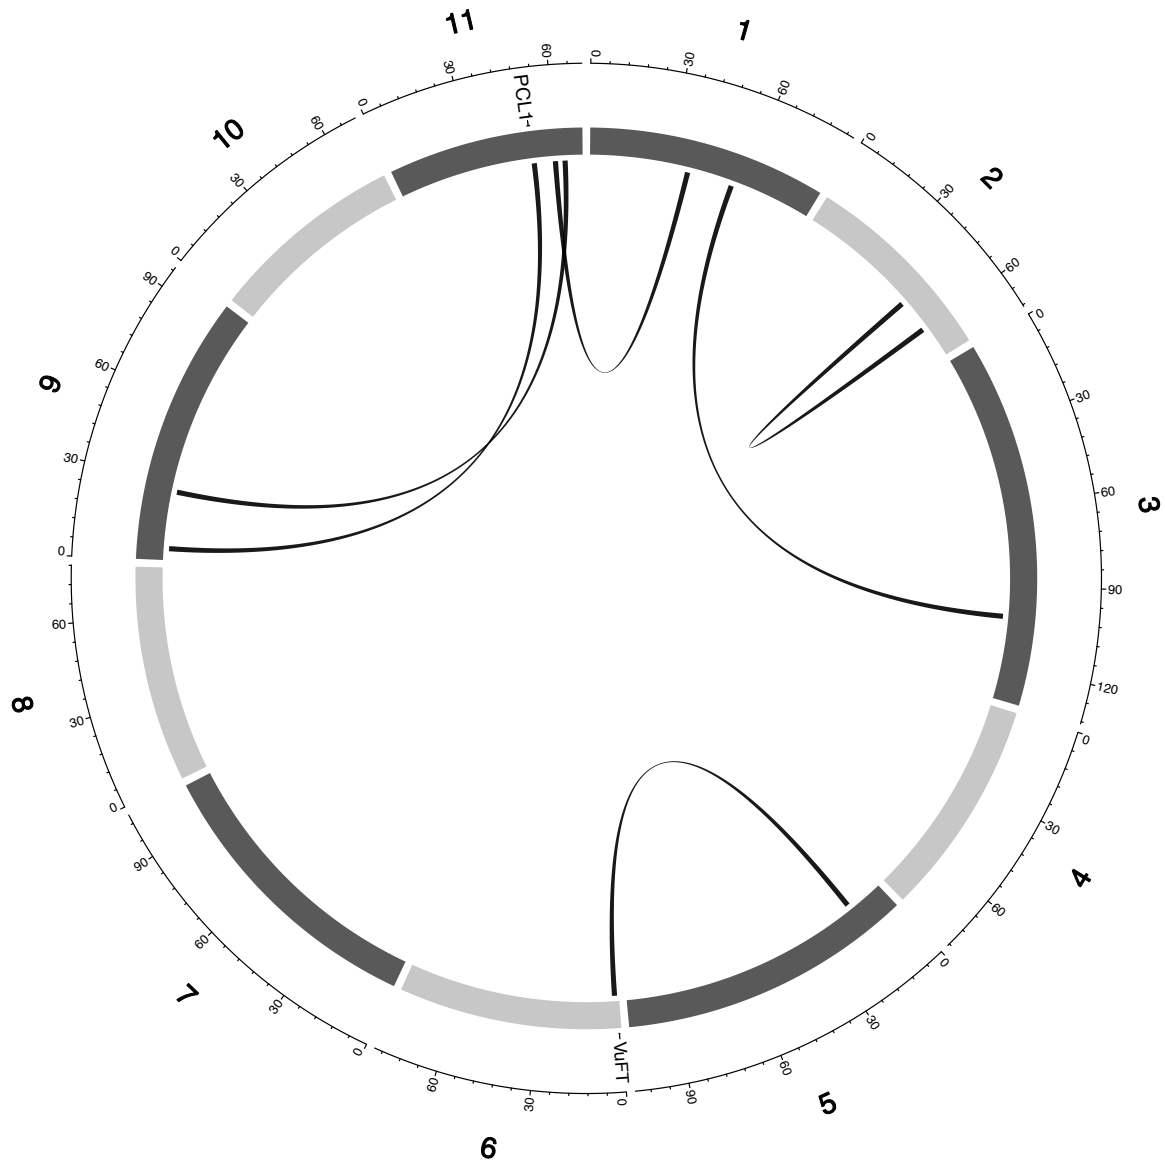

1013  
1014 **Figure S 5: Genetic map of the cowpea multiparent advanced generation inter-cross population (MAGIC)**  
1015 **with pairwise interactions between epistatic QTL for FTRILD (Flowering time under restricted**  
1016 **irrigation and long day).** Chromosomes are shown in shades of gray, two-way interacting loci are connected  
1017 with black solid lines, and colocalized a priori genes are texts between chromosomes and genetic map.

1018

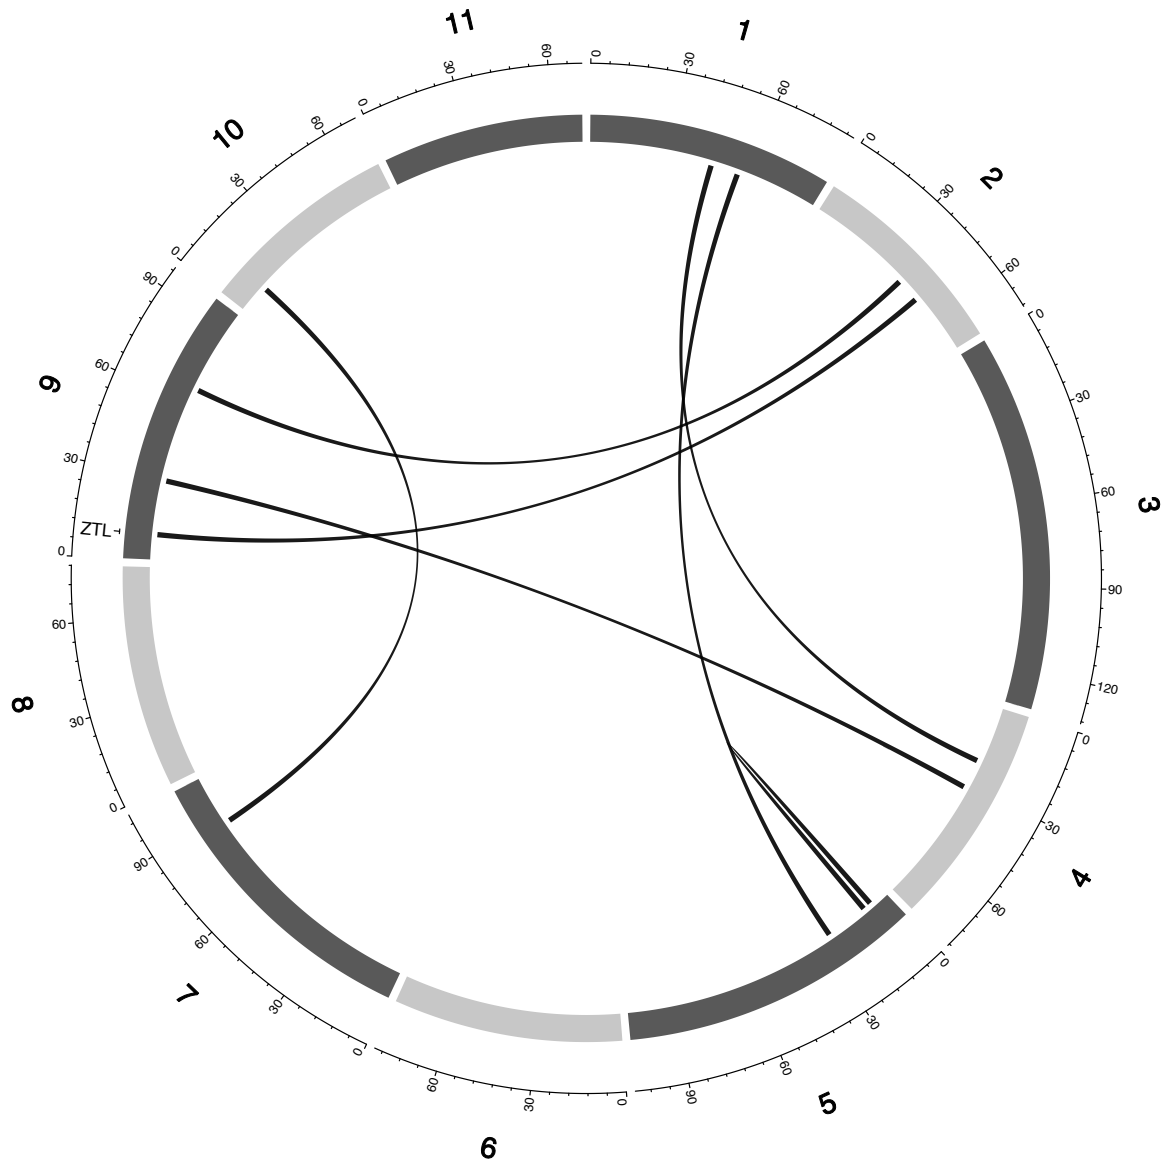

1019  
1020 **Figure S 6: Genetic map of the cowpea multiparent advanced generation inter-cross population (MAGIC)**  
1021 **with pairwise interactions between epistatic QTL for FTFISD (Flowering time under full irrigation and**  
1022 **short day).** Chromosomes are shown in shades of gray, two-way interacting loci are connected with black solid  
1023 lines, and colocalized a priori genes are texts between chromosomes and genetic map.

1024

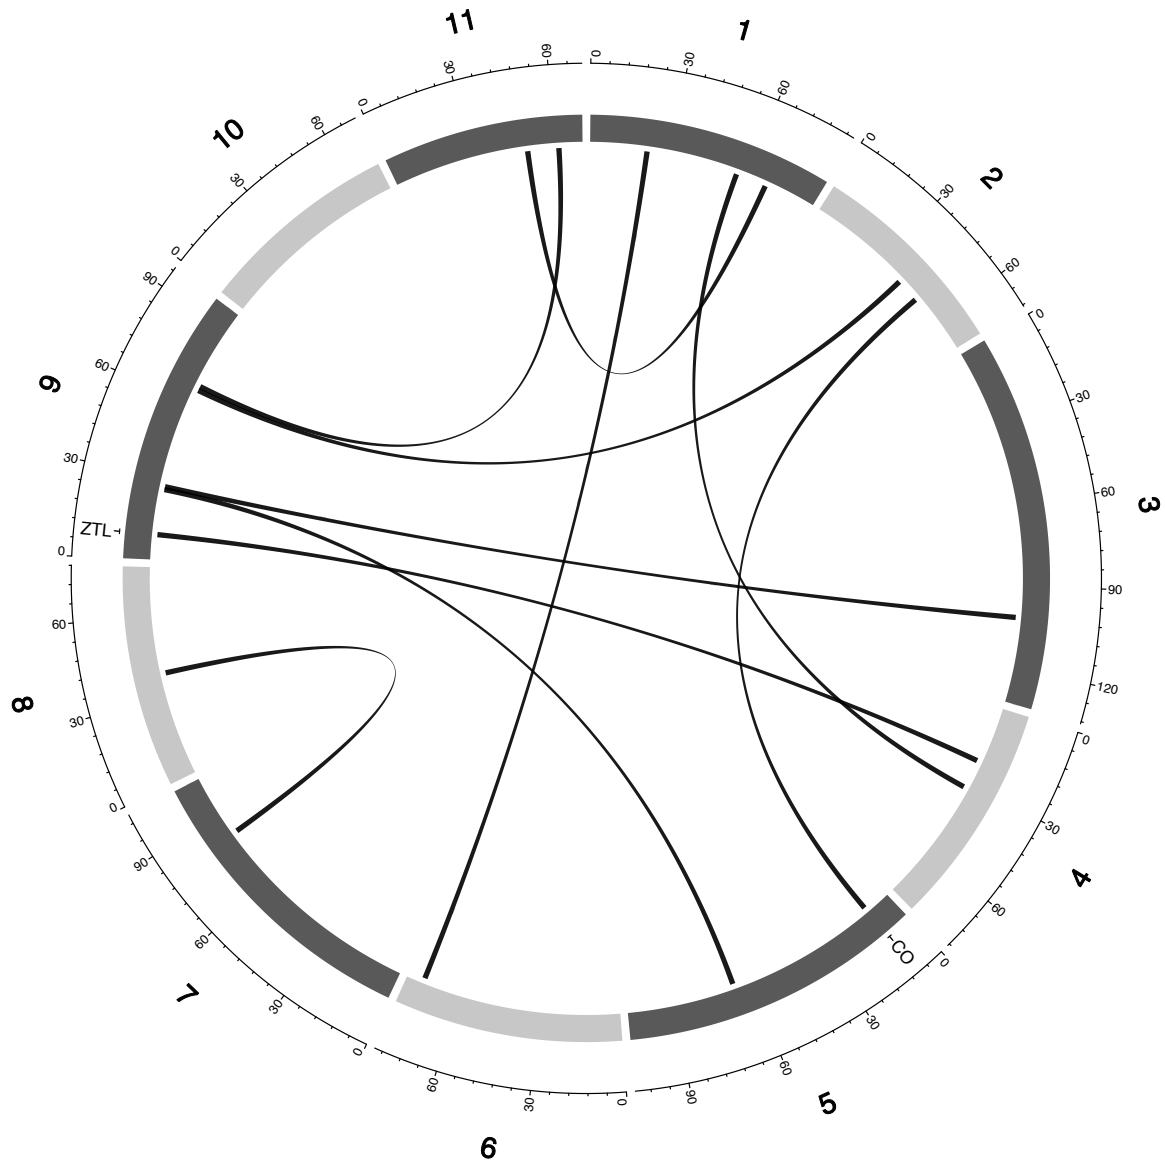

1025  
1026  
1027  
1028  
1029

**Figure S 7: Genetic map of the cowpea multiparent advanced generation inter-cross population (MAGIC) with pairwise interactions between epistatic QTL for FTRISD (Flowering time under restricted irrigation and short day).** Chromosomes are shown in shades of gray, two-way interacting loci are connected with black solid lines, and colocalized a priori genes are texts between chromosomes and genetic map.

1030  
1031

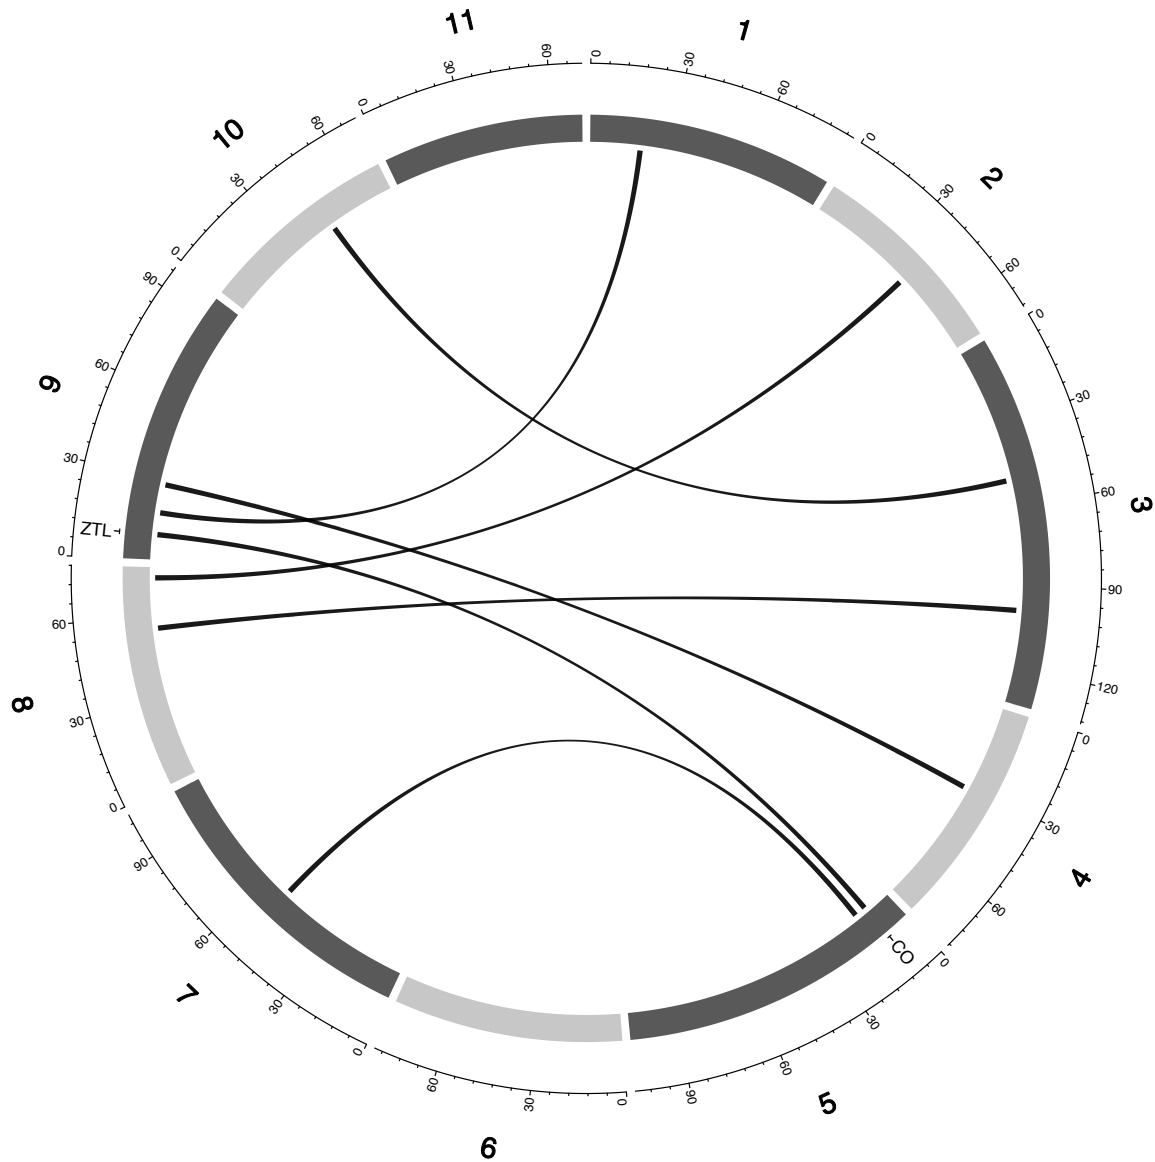

1032  
1033 **Figure S 8: Genetic map of the cowpea multiparent advanced generation inter-cross population (MAGIC)**  
1034 **with pairwise interactions between epistatic QTL for MFISD (Maturity under full irrigation and short**  
1035 **day).** Chromosomes are shown in shades of gray, two-way interacting loci are connected with black solid lines,  
1036 and colocalized a priori genes are texts between chromosomes and genetic map.

1037

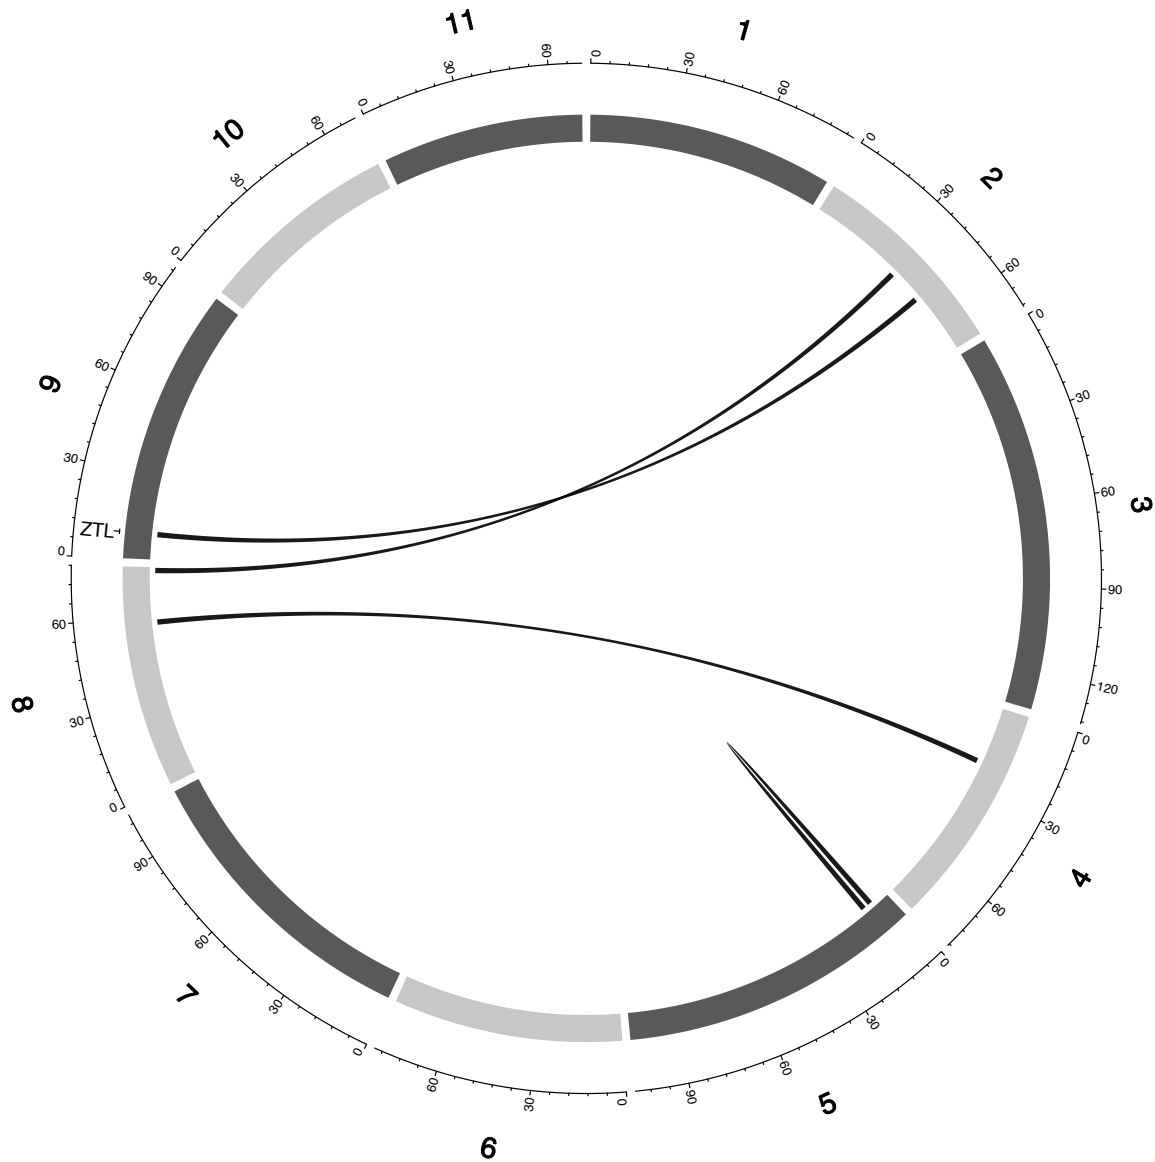

1038  
1039 **Figure S 9: Genetic map of the cowpea multiparent advanced generation inter-cross population (MAGIC)**  
1040 **with pairwise interactions between epistatic QTL for MRISD (Maturity under restricted irrigation and**  
1041 **short day).** Chromosomes are shown in shades of gray, two-way interacting loci are connected with black solid  
1042 lines, and colocalized a priori genes are texts between chromosomes and genetic map.

1043

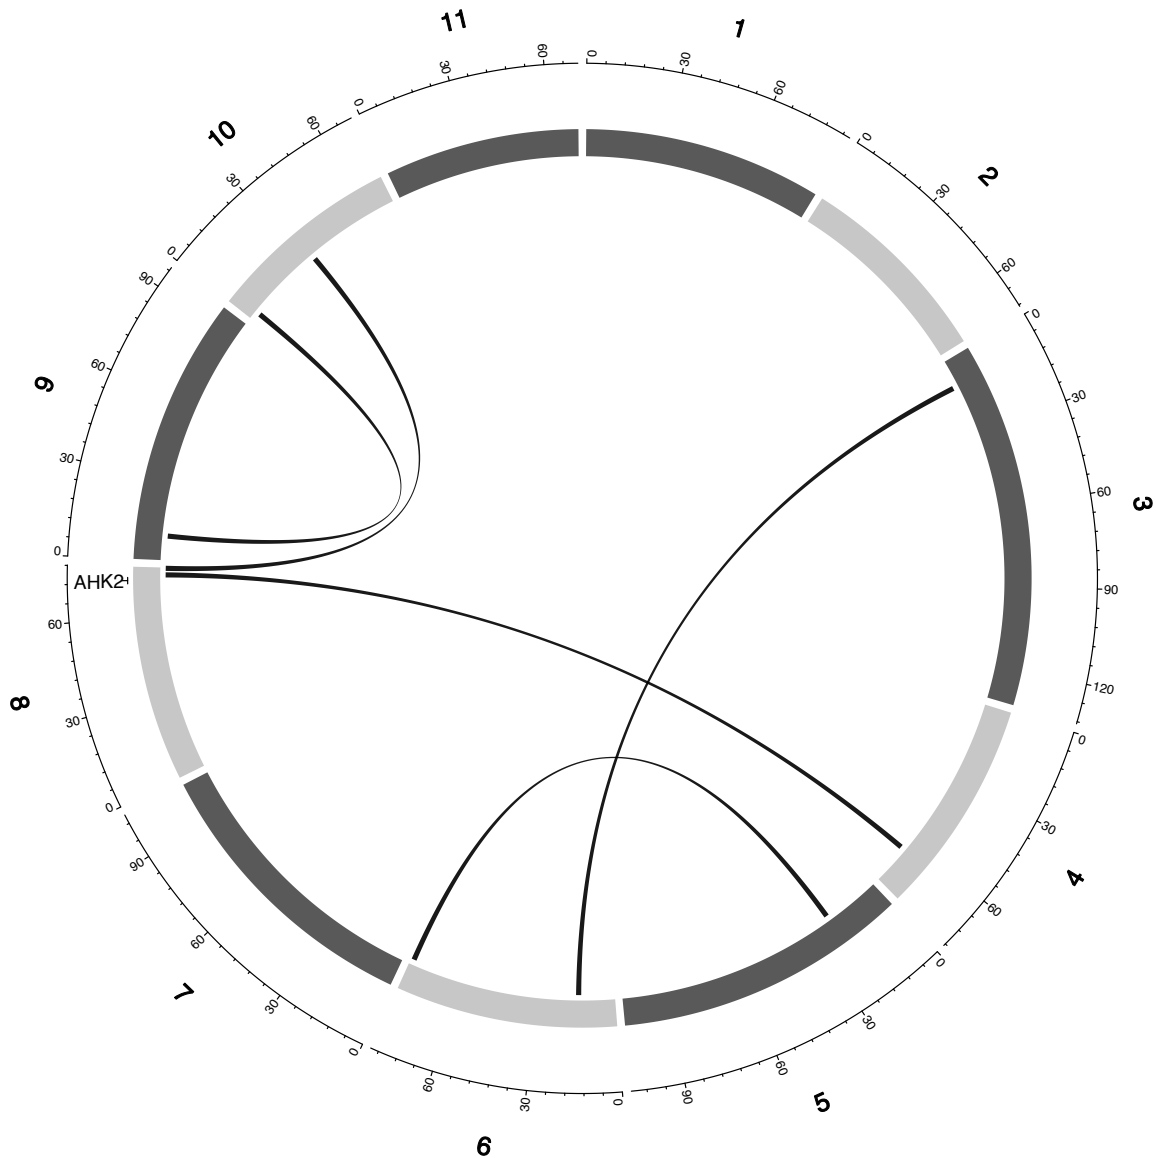

1044  
1045 **Figure S 10: Genetic map of the cowpea multiparent advanced generation inter-cross population**  
1046 **(MAGIC) with pairwise interactions between epistatic QTL for SSFISD (Seed Size under full irrigation**  
1047 **and short day).** Chromosomes are shown in shades of gray, two-way interacting loci are connected with black  
1048 solid lines, and colocalized a priori genes are texts between chromosomes and genetic map.

1049



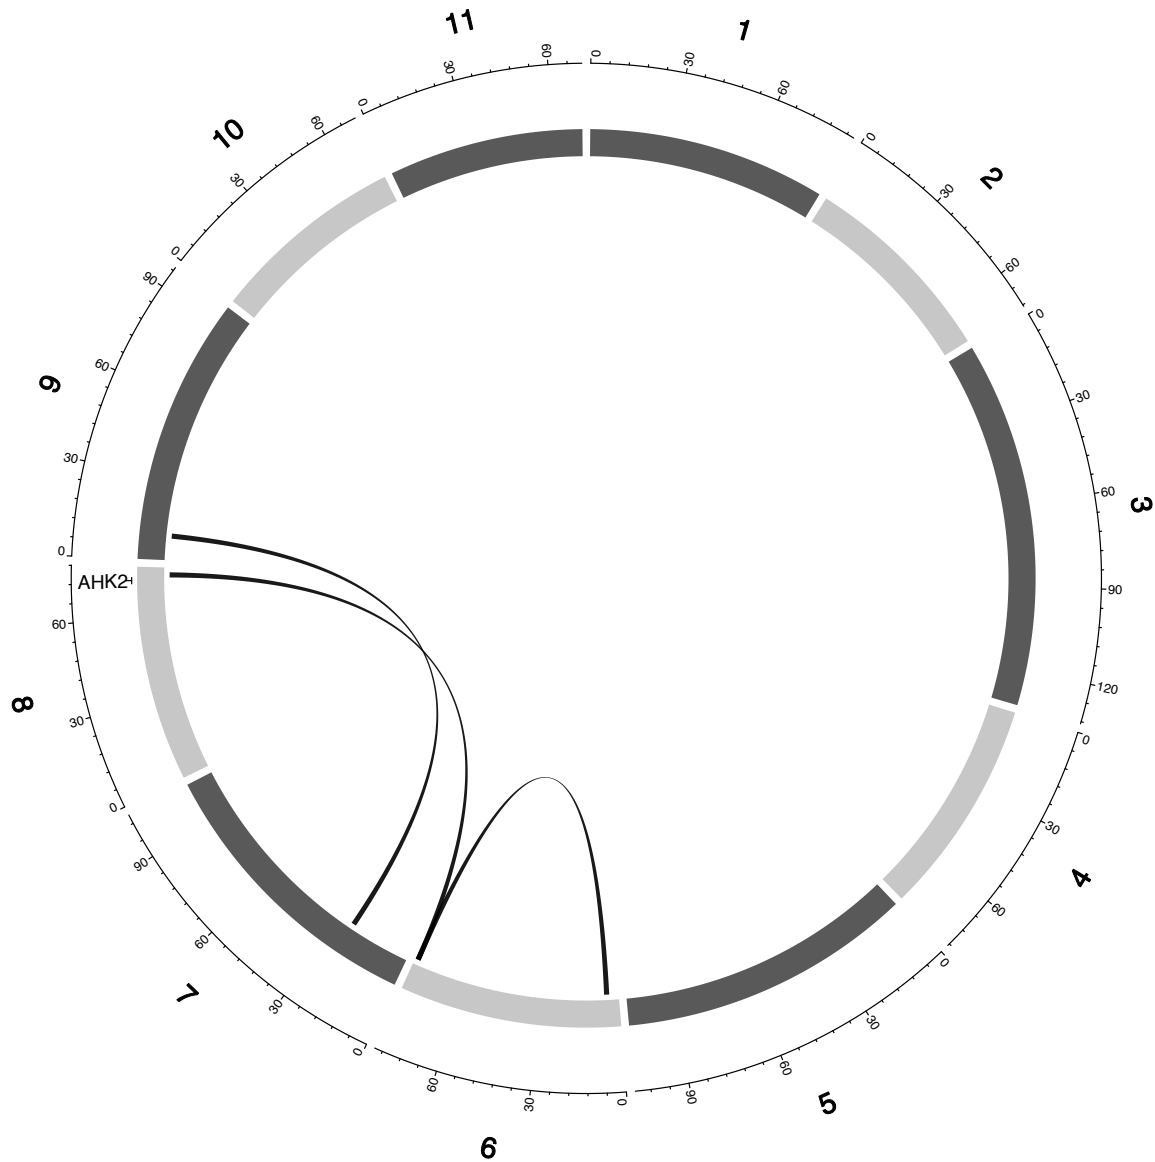

1050  
1051  
1052  
1053  
1054

**Figure S 11: Genetic map of the cowpea multiparent advanced generation inter-cross population (MAGIC) with pairwise interactions between epistatic QTL for SSRISD (Seed size under restricted irrigation and short day).** Chromosomes are shown in shades of gray, two-way interacting loci are connected with black solid lines, and colocalized a priori genes are texts between chromosomes and genetic map.

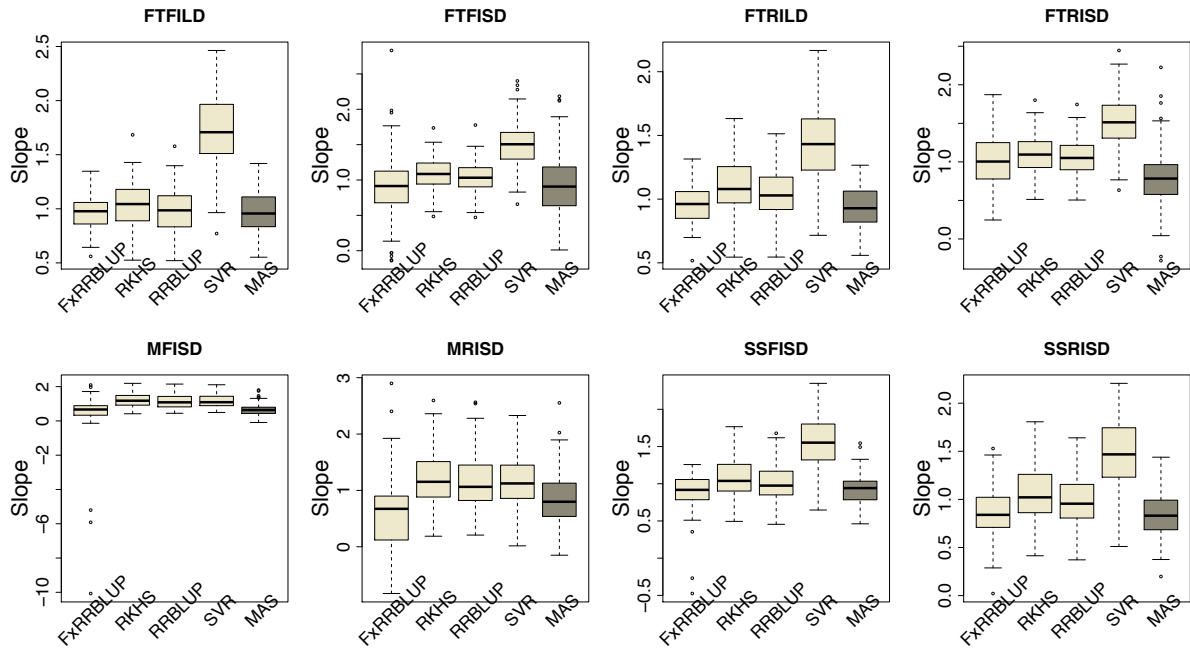

**Figure S 12: Comparison of Slope of regression between observed and predicted trait values across GS and MAS models.** Boxplots in each panel showed the distribution of slope values across 100 cycles for FxRRBLUP (Ridge Regression Best Linear Unbiased Prediction: Parametric model with fixed effects), RKHS (Reproducing Kernel Hilbert Space; Semi-Parametric model), RRBLUP (Ridge Regression Best Linear Unbiased Prediction: Parametric model with no fixed effects), SVR (Support Vector Regression: Non-Parametric model), and MAS (Marker Assisted Selection) for flowering time under full irrigation and long day (FTFILED), flowering time under restricted irrigation and long day (FTRILD), flowering time under full irrigation and short day (FTFISD), flowering time under restricted irrigation and short day (FTRISD), maturity under full irrigation and short day (MFISD), maturity under restricted irrigation and short day, seed size under full irrigation and short day (SSFISD), and seed size under restricted irrigation and short day (SSRISD).

1055  
1056  
1057  
1058  
1059  
1060  
1061  
1062  
1063  
1064

1065

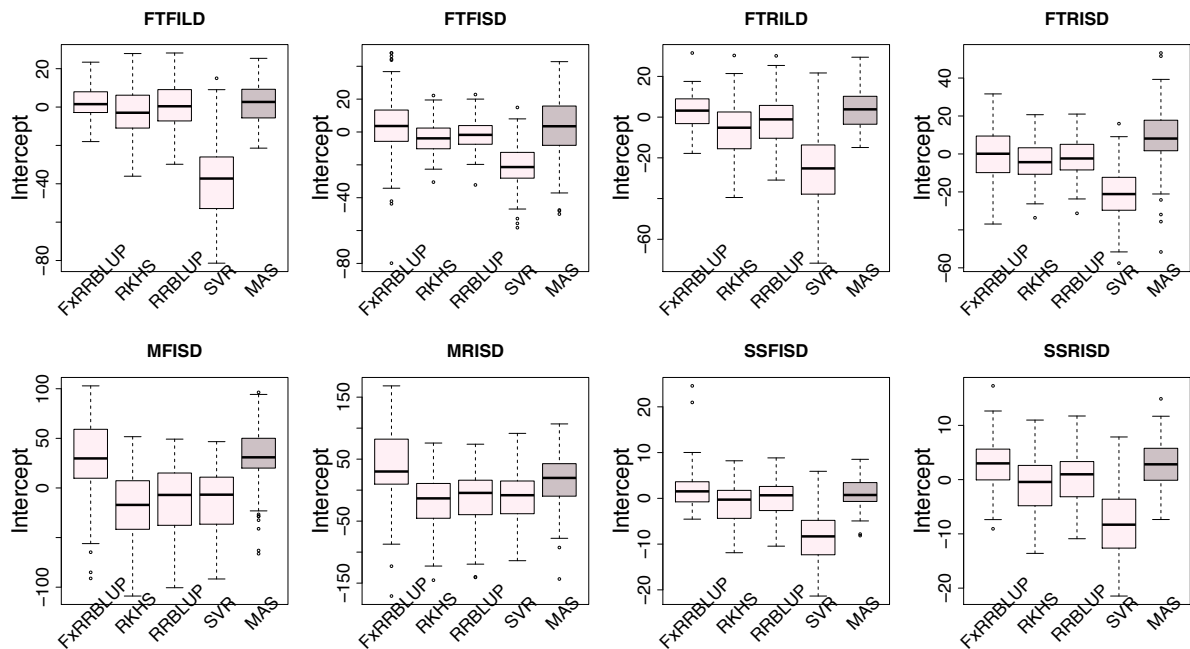

**Figure S 13: Comparison of intercept of regression between observed and predicted trait values across GS and MAS models.** Boxplots in each panel showed the distribution of intercept values across 100 cycles for FxRRBLUP (Ridge Regression Best Linear Unbiased Prediction: Parametric model with fixed effects), RKHS (Reproducing Kernel Hilbert Space; Semi-Parametric model), RRBLUP (Ridge Regression Best Linear Unbiased Prediction: Parametric model with no fixed effects), SVR (Support Vector Regression: Non-Parametric model), and MAS (Marker Assisted Selection) for flowering time under full irrigation and long day (FTFILED), flowering time under restricted irrigation and long day (FTRILD), flowering time under full irrigation and short day (FTFISD), flowering time under restricted irrigation and short

1066  
1067  
1068  
1069  
1070  
1071  
1072  
1073

1074 day (FTRISD), maturity under full irrigation and short day (MFISSD), maturity under restricted irrigation and short day, seed  
 1075 size under full irrigation and short day (SSFISD), and seed size under restricted irrigation and short day (SSRISD).

1076

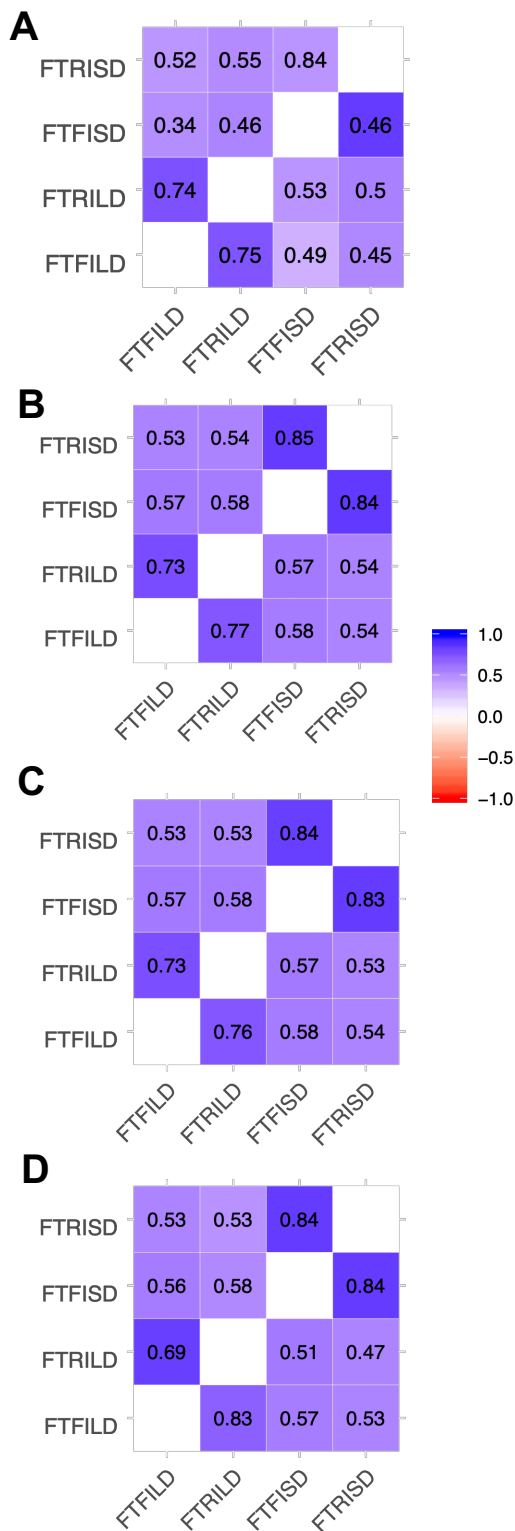

1077  
 1078 **Figure S 14: Environment by environment prediction values across GS models.** Boxplots in each panel showed the  
 1079 distribution of intercept values across 100 cycles for (A) FxRRBLUP (Ridge Regression Best Linear Unbiased Prediction:  
 1080 Parametric model with fixed effects), (B) RKHS (Reproducing Kernel Hilbert Space; Semi-Parametric model), (C)  
 1081 RRBLUP (Ridge Regression Best Linear Unbiased Prediction: Parametric model with no fixed effects), and (D) SVR  
 1082 (Support Vector Regression: Non-Parametric model) for flowering time under full irrigation and long day (FTFILD),  
 1083 flowering time under restricted irrigation and long day (FTRILD), flowering time under full irrigation and short day  
 1084 (FTFISD), flowering time under restricted irrigation and short day (FTRISD)

1085  
1086

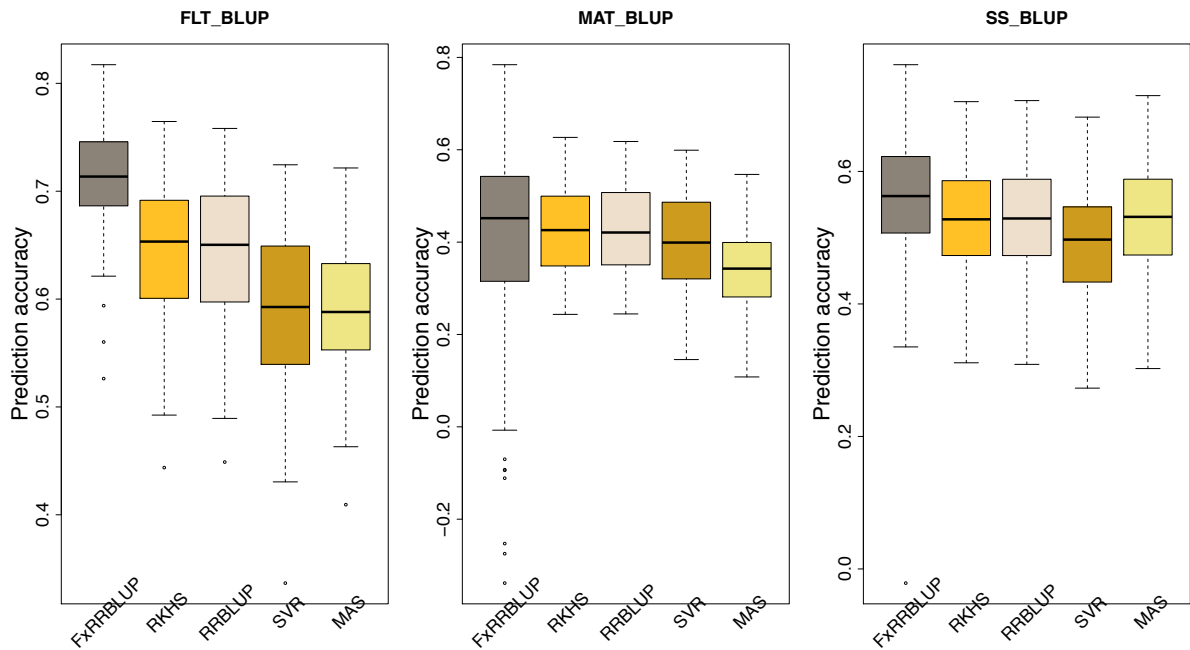

1087  
1088  
1089  
1090  
1091  
1092  
1093

**Figure S 15: Comparison of prediction accuracy across GS and MAS models.** Boxplots in each panel showed the distribution of prediction accuracy values across 100 cycles for FxRRBLUP (Ridge Regression Best Linear Unbiased Prediction: Parametric model with fixed effects), RKHS (Reproducing Kernel Hilbert Space; Semi-Parametric model), RRBLUP (Ridge Regression Best Linear Unbiased Prediction: Parametric model with no fixed effects), SVR (Support Vector Regression: Non-Parametric model), and MAS (Marker Assisted Selection) for flowering time BLUP (FLT\_BLUP), maturity BLUP (MAT\_BLUP), seed size BLUP (SS\_BLUP).

1094  
1095

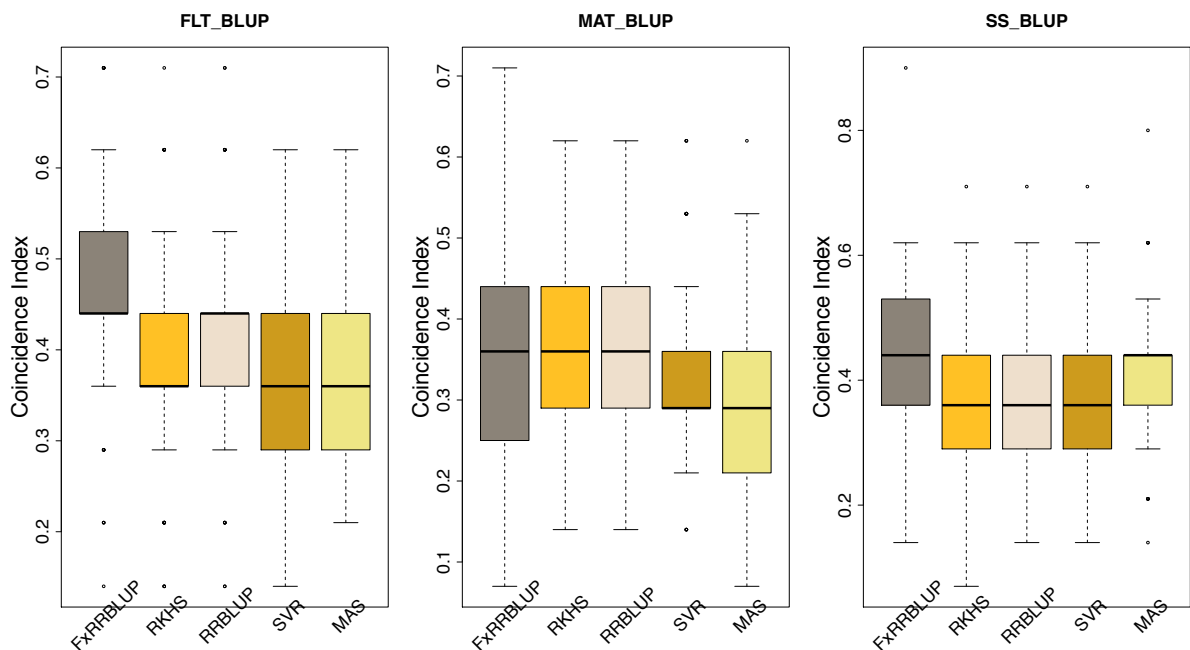

1096  
1097  
1098  
1099  
1100  
1101  
1102

**Figure S 16: Comparison of coincidence index across GS and MAS models.** Boxplots in each panel showed the distribution of coincidence index values across 100 cycles for FxRRBLUP (Ridge Regression Best Linear Unbiased Prediction: Parametric model with fixed effects), RKHS (Reproducing Kernel Hilbert Space; Semi-Parametric model), RRBLUP (Ridge Regression Best Linear Unbiased Prediction: Parametric model with no fixed effects), SVR (Support Vector Regression: Non-Parametric model), and MAS (Marker Assisted Selection) for flowering time BLUP (FLT\_BLUP), maturity BLUP (MAT\_BLUP), seed size BLUP (SS\_BLUP).

1103  
1104  
1105  
1106  
1107  
1108  
1109

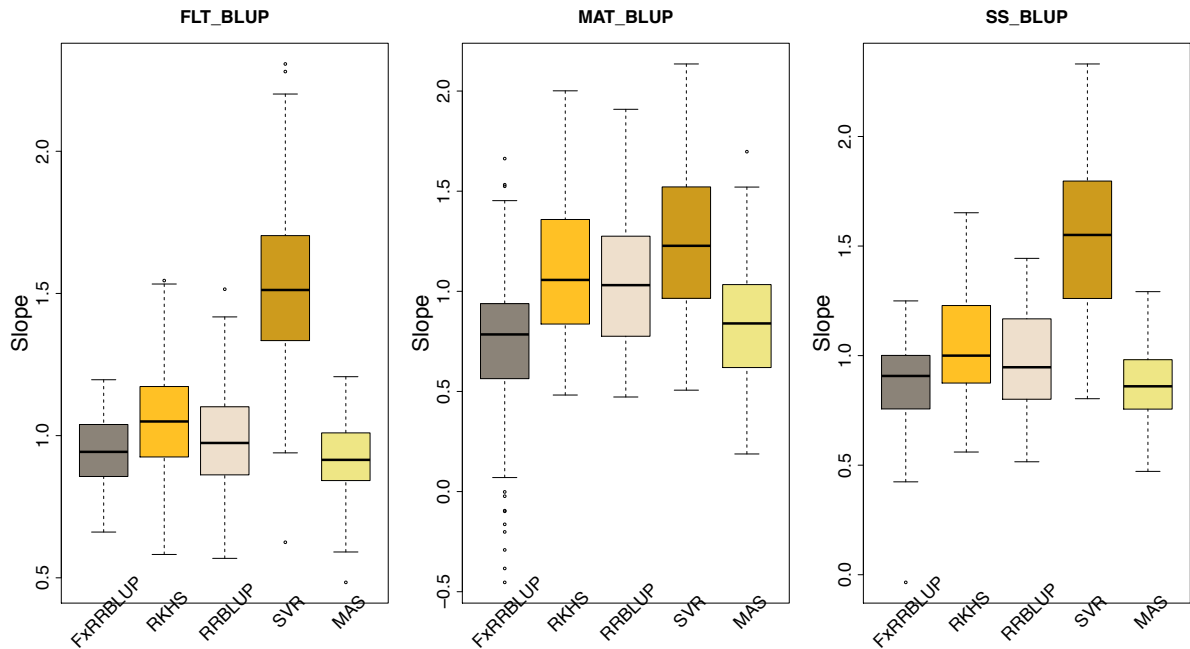

1110  
1111  
1112  
1113  
1114  
1115  
1116

**Figure S 17: Comparison of slope values across GS and MAS models.** Boxplots in each panel showed the distribution of slope values across 100 cycles for FxRRBLUP (Ridge Regression Best Linear Unbiased Prediction: Parametric model with fixed effects), RKHS (Reproducing Kernel Hilbert Space; Semi-Parametric model), RRBLUP (Ridge Regression Best Linear Unbiased Prediction: Parametric model with no fixed effects), SVR (Support Vector Regression: Non-Parametric model), and MAS (Marker Assisted Selection) for flowering time BLUP (FLT\_BLUP), maturity BLUP (MAT\_BLUP), seed size BLUP (SS\_BLUP).

1117  
1118  
1119

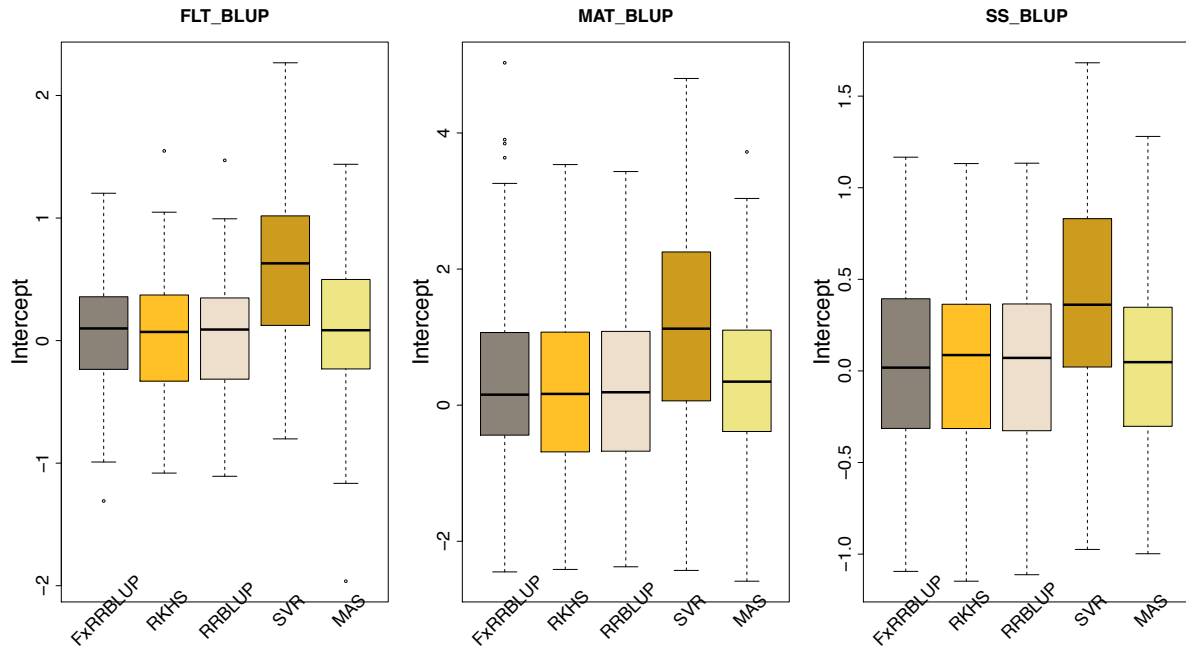

1120  
1121  
1122  
1123  
1124  
1125  
1126

**Figure S 18: Comparison of intercept values across GS and MAS models.** Boxplots in each panel showed the distribution of intercept values across 100 cycles for FxRRBLUP (Ridge Regression Best Linear Unbiased Prediction: Parametric model with fixed effects), RKHS (Reproducing Kernel Hilbert Space; Semi-Parametric model), RRBLUP (Ridge Regression Best Linear Unbiased Prediction: Parametric model with no fixed effects), SVR (Support Vector Regression: Non-Parametric model), and MAS (Marker Assisted Selection) for flowering time BLUP (FLT\_BLUP), maturity BLUP (MAT\_BLUP), seed size BLUP (SS\_BLUP).

1127

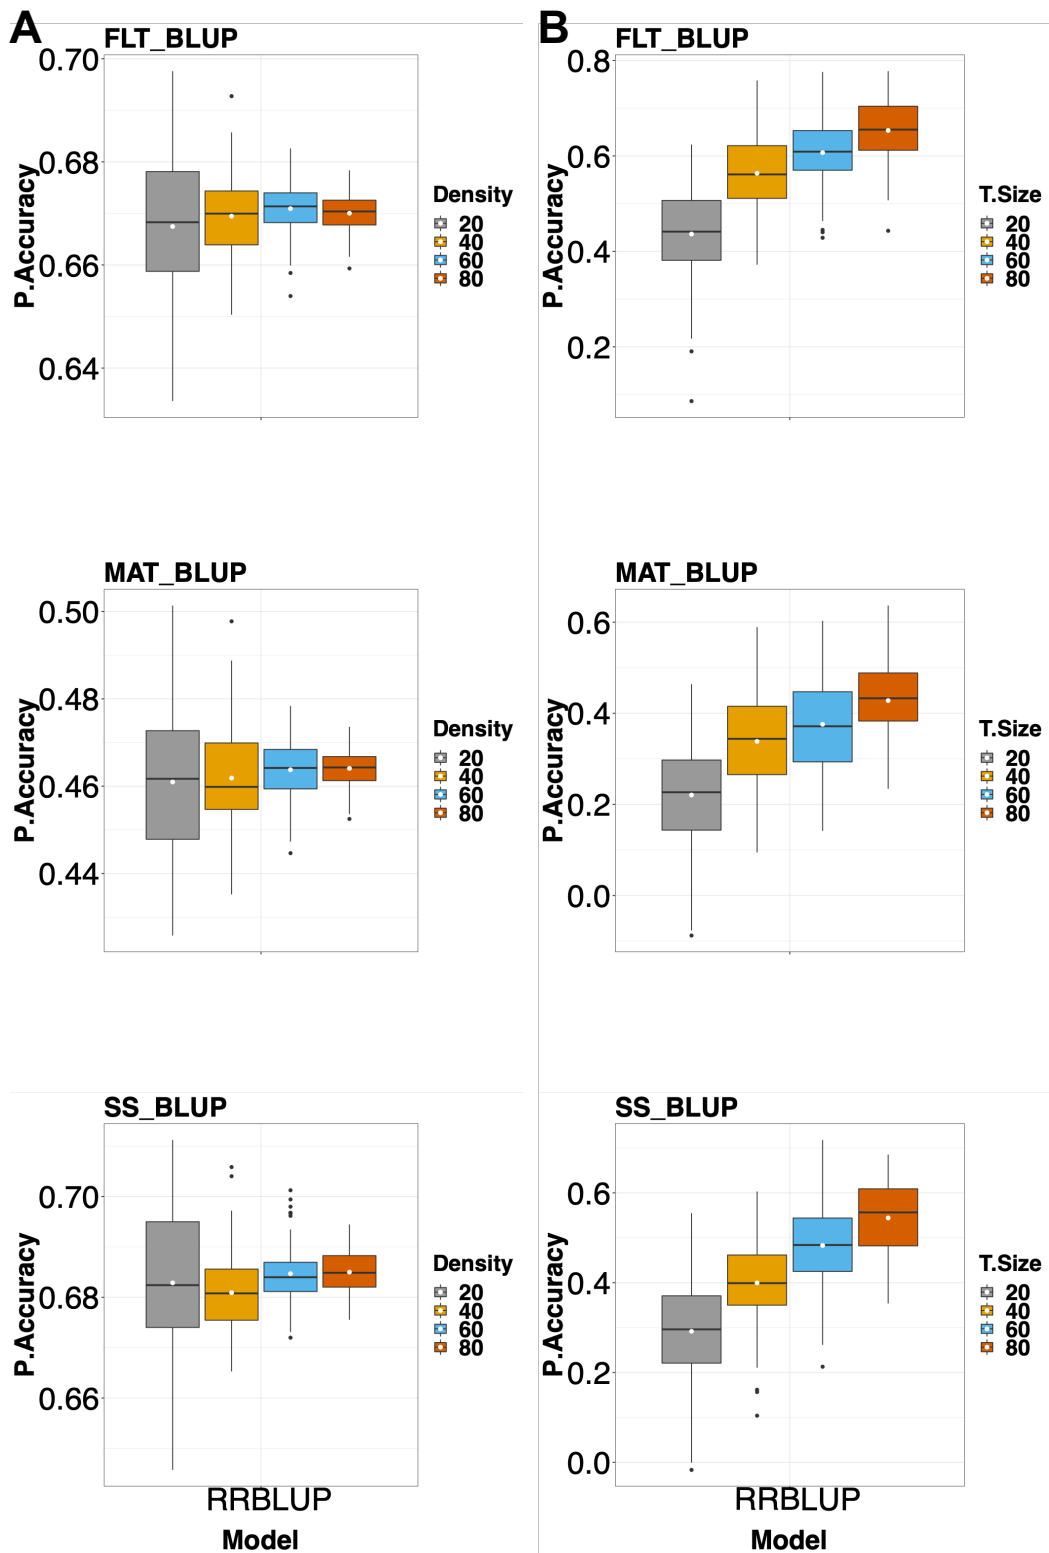

1128  
1129  
1130  
1131

**Figure S 19: The effect of marker density and training population size on prediction accuracy.** (A) Boxplots showing comparison among different marker densities (20%, 40%, 60%, and 80%). (B) Boxplots showing comparison among different training population sizes (20%, 40%, 60%, and 80%).

1132



1133 **Supplementary Tables**

1134 **Table S 1: Environment by Environment correlation for flowering time.**

| <b>Traits</b>                          | <b>FTFILD</b> | <b>FTRILD</b> | <b>FTFISD</b> | <b>FTRISD</b> |
|----------------------------------------|---------------|---------------|---------------|---------------|
| <b>FTFILD</b>                          | -             | 0.76          | 0.50          | 0.44          |
| <b>FTRILD</b>                          |               | -             | 0.57          | 0.52          |
| <b>FTFISD</b>                          |               |               | -             | 0.86          |
| <b>FTRISD</b>                          |               |               |               | -             |
| <b>Heritability (<math>h^2</math>)</b> | 0.41          | 0.42          | 0.48          | 0.46          |

1135

1136 **Table S 2: Environment by environment correlation for maturity and seed size.**

| <b>Traits</b>                          | <b>MFISD</b> | <b>MRISD</b> | <b>SSFISD</b> | <b>SSRISD</b> |
|----------------------------------------|--------------|--------------|---------------|---------------|
| <b>Heritability (<math>h^2</math>)</b> | 0.30         | 0.21         | 0.47          | 0.39          |
| <b>MFISD</b>                           | -            | 0.64         | -             | -             |
| <b>SSFISD</b>                          |              |              | -             | 0.80          |

1137

1138

1139

1140

1141

1142

1143

1144

1145

1146

1147

1148

1149

1150

1151

1152

1153

1154

1155

1156

1157

1158

1159

1160

1161

1162

1163

1164

1165

1166

1167

1168

1169

**Table S 3: QTL identified by stepwise regression explaining at least 6% of phenotypic variation.**

| <b>Trait</b> | <b>QTL</b> | <b>Chr.</b> | <b>Pos.</b> | <b>PVE</b> | <b>ADE</b> | <b>MAF</b> |
|--------------|------------|-------------|-------------|------------|------------|------------|
| FLT_BLUP     | qVu9:24.77 | 9           | 24.7747     | 24.2       | 3.1        | 0.28       |

|          |             |    |         |      |     |      |
|----------|-------------|----|---------|------|-----|------|
| FLT_BLUP | qVu9:5.85   | 9  | 5.8471  | 13.0 | 2.1 | 0.4  |
| FLT_BLUP | qVu11:49.06 | 11 | 49.0616 | 8.9  | 1.7 | 0.36 |
| FLT_BLUP | qVu5:8.5    | 5  | 8.5038  | 7.8  | 1.6 | 0.48 |
| FLT_BLUP | qVu4:29     | 4  | 29.0011 | 7.1  | 1.5 | 0.49 |
| FTFILD   | qVu9:24.77  | 9  | 24.7747 | 25.0 | 7   | 0.28 |
| FTFILD   | qVu9:22.65  | 9  | 22.648  | 19.5 | 5.6 | 0.49 |
| FTFILD   | qVu11:49.06 | 11 | 49.0616 | 10.9 | 4.4 | 0.36 |
| FTFISD   | qVu9:8.37   | 9  | 8.367   | 10.5 | 1.5 | 0.35 |
| FTFISD   | qVu4:31.3   | 4  | 31.2954 | 8.4  | 1.3 | 0.47 |
| FTFISD   | qVu5:8.5    | 5  | 8.5038  | 7.9  | 1.9 | 0.13 |
| FTFISD   | qVu4:20.34  | 4  | 20.3441 | 7.5  | 1.7 | 0.14 |
| FTFISD   | qVu2:40.37  | 2  | 40.3707 | 7.1  | 1.2 | 0.37 |
| FTRILD   | qVu9:23.36  | 9  | 23.3558 | 27.5 | 6.9 | 0.29 |
| FTRILD   | qVu5:8.5    | 5  | 8.5038  | 7.3  | 3.3 | 0.48 |
| FTRILD   | qVu11:49.06 | 11 | 49.0616 | 7.0  | 3.3 | 0.36 |
| FTRISD   | qVu4:19.99  | 4  | 19.9946 | 10.6 | 2.2 | 0.15 |
| FTRISD   | qVu1:55.11  | 1  | 55.111  | 8.2  | 1.4 | 0.47 |
| FTRISD   | qVu9:8.37   | 9  | 8.367   | 8.0  | 1.4 | 0.35 |
| FTRISD   | qVu4:31.3   | 4  | 31.2954 | 6.8  | 1.3 | 0.47 |
| FTRISD   | qVu5:3.9    | 5  | 3.8966  | 6.8  | 1.3 | 0.46 |
| MAT_BLUP | qVu2:45.2   | 2  | 45.203  | 9.5  | 3.3 | 0.31 |
| MAT_BLUP | qVu9:5.85   | 9  | 5.8471  | 8.6  | 3   | 0.38 |
| MAT_BLUP | qVu4:19.99  | 4  | 19.9946 | 6.0  | 3.5 | 0.15 |
| MFISD    | qVu5:13.76  | 5  | 13.7582 | 8.2  | 3.5 | 0.35 |
| MFISD    | qVu9:5.85   | 9  | 5.8471  | 6.6  | 3   | 0.49 |
| MRISD    | qVu2:45.2   | 2  | 45.203  | 9.6  | 6.1 | 0.31 |
| MRISD    | qVu9:8.37   | 9  | 8.367   | 8.6  | 5.5 | 0.39 |
| SS_BLUP  | qVu8:74.29  | 8  | 74.2918 | 25.2 | 2.1 | 0.25 |
| SS_BLUP  | qVu6:78.35  | 6  | 78.3467 | 10.7 | 1.2 | 0.49 |
| SSFISD   | qVu8:74.21  | 8  | 74.2124 | 29.3 | 2.5 | 0.24 |
| SSFISD   | qVu6:78.35  | 6  | 78.3467 | 9.2  | 1.3 | 0.49 |
| SSRISD   | qVu8:76.81  | 8  | 76.8132 | 19.7 | 2.4 | 0.23 |
| SSRISD   | qVu6:78.35  | 6  | 78.3467 | 10.0 | 1.5 | 0.49 |

1170 Quantitative trait loci (QTL), Chromosome (Chr.), Position (Pos. in centimorgan), Additive  
1171 effect (ADE), Phenotypic variation explained (PVE), and Minor allele frequency (MAF).  
1172

1173 **Table S 4: Epistatic QTL identified by SPAEML and their effect sizes.**

| <b>Trait</b> | <b>QTL1</b> | <b>ADE1</b> | <b>MAF1</b> | <b>QTL2</b> | <b>ADE2</b> | <b>MAF2</b> |
|--------------|-------------|-------------|-------------|-------------|-------------|-------------|
| FLT_BLUP     | qVu9:25.39  | 3.1         | 0.28        | qVu11:62.84 | 1.9         | 0.14        |
| FLT_BLUP     | qVu9:5.86   | 2.1         | 0.39        | qVu11:42.83 | 1.8         | 0.14        |
| FLT_BLUP     | qVu5:12.79  | 1.7         | 0.34        | qVu6:78.36  | 0.5         | 0.47        |
| FLT_BLUP     | qVu4:31.3   | 1.3         | 0.48        | qVu6:1.47   | 1.6         | 0.15        |
| FLT_BLUP     | qVu1:66.57  | 1.6         | 0.12        | qVu9:26.8   | 1.5         | 0.26        |
| FLT_BLUP     | qVu4:30.21  | 0.2         | 0.44        | qVu7:45.81  | 0.4         | 0.43        |
| FTFILD       | qVu9:25.39  | 7           | 0.28        | qVu11:50.94 | 4.6         | 0.26        |
| FTFILD       | qVu5:12.79  | 2.9         | 0.34        | qVu11:35.28 | 1.6         | 0.40        |
| FTFILD       | qVu1:66.38  | 3.3         | 0.22        | qVu4:31.03  | 2.3         | 0.47        |
| FTFILD       | qVu1:66.57  | 4.3         | 0.12        | qVu5:52.97  | 0.9         | 0.37        |
| FTFILD       | qVu6:32.5   | 1.2         | 0.12        | qVu9:86.49  | 1.1         | 0.34        |
| FTFISD       | qVu4:31.3   | 1.2         | 0.48        | qVu9:28.65  | 0.8         | 0.41        |
| FTFISD       | qVu1:55.11  | 1.2         | 0.37        | qVu5:25.01  | 0.4         | 0.10        |
| FTFISD       | qVu2:48.05  | 0.9         | 0.30        | qVu9:8.37   | 1.4         | 0.39        |
| FTFISD       | qVu7:84.88  | 0.6         | 0.38        | qVu10:10.07 | 0.8         | 0.36        |
| FTFISD       | qVu5:5.81   | 0.6         | 0.16        | qVu5:8.91   | 1           | 0.49        |
| FTRILD       | qVu9:25.39  | 6.6         | 0.28        | qVu11:62.84 | 3.8         | 0.14        |
| FTRILD       | qVu5:12.79  | 3.7         | 0.34        | qVu6:0.68   | 2.4         | 0.39        |
| FTRISD       | qVu4:20.34  | 2.1         | 0.14        | qVu9:8.37   | 1.3         | 0.39        |
| FTRISD       | qVu1:54.81  | 1.3         | 0.37        | qVu4:31.3   | 1.2         | 0.48        |
| FTRISD       | qVu1:66.38  | 1.2         | 0.22        | qVu11:49.06 | 1.1         | 0.39        |
| FTRISD       | qVu7:80.11  | 0.3         | 0.47        | qVu8:37.41  | 0.6         | 0.48        |
| MAT_BLUP     | qVu2:48.05  | 2.8         | 0.30        | qVu9:8.37   | 3           | 0.39        |
| MFISD        | qVu5:12.79  | 3.4         | 0.34        | qVu7:50.14  | 2           | 0.27        |
| MFISD        | qVu2:39.29  | 2.4         | 0.36        | qVu8:73.15  | 2.4         | 0.34        |
| MFISD        | qVu5:8.5    | 2.8         | 0.19        | qVu9:8.37   | 2.8         | 0.39        |
| MRISD        | qVu2:48.05  | 5.3         | 0.30        | qVu9:8.37   | 5.5         | 0.39        |
| MRISD        | qVu2:35.19  | 5.4         | 0.21        | qVu8:75.88  | 4.8         | 0.24        |
| SS_BLUP      | qVu6:78.36  | 1.1         | 0.47        | qVu7:18.1   | 0.4         | 0.11        |
| SS_BLUP      | qVu6:78.35  | 0.8         | 0.13        | qVu8:74.29  | 2.1         | 0.25        |
| SSFISD       | qVu4:62.75  | 0.8         | 0.10        | qVu8:74.29  | 2.5         | 0.25        |
| SSFISD       | qVu5:20.54  | 0.6         | 0.11        | qVu6:78.36  | 1.2         | 0.47        |
| SSRISD       | qVu6:78.35  | 1           | 0.13        | qVu8:74.29  | 2.2         | 0.25        |
| SSRISD       | qVu6:3.67   | 0.8         | 0.12        | qVu6:78.36  | 1.4         | 0.47        |

1174 Quantitative trait loci (QTL), Linkage group (LG), Position (Pos. in centimorgan), Additive  
 1175 effect (ADE), , and Minor allele frequency (MAF).  
 1176

1177 **Table S 5: Mean and standard deviation of prediction accuracy across GS and MAS models.**

| Trait   | FxRRBLUP  | RKHS      | RRBLUP    | SVR       | MAS       |
|---------|-----------|-----------|-----------|-----------|-----------|
| FT_BLUP | 0.71±0.05 | 0.65±0.07 | 0.65±0.07 | 0.59±0.08 | 0.59±0.06 |
| FTFILD  | 0.68±0.05 | 0.55±0.08 | 0.55±0.08 | 0.54±0.08 | 0.64±0.06 |
| FTFISD  | 0.56±0.20 | 0.59±0.07 | 0.59±0.07 | 0.55±0.08 | 0.33±0.11 |
| FTRILD  | 0.68±0.07 | 0.58±0.08 | 0.58±0.07 | 0.50±0.08 | 0.61±0.08 |
| FTRISD  | 0.58±0.17 | 0.58±0.07 | 0.58±0.07 | 0.53±0.08 | 0.25±0.10 |
| MT_BLUP | 0.40±0.23 | 0.42±0.09 | 0.42±0.09 | 0.40±0.10 | 0.33±0.09 |
| MFISD   | 0.30±0.20 | 0.39±0.09 | 0.39±0.09 | 0.36±0.09 | 0.20±0.10 |
| MRISD   | 0.25±0.29 | 0.37±0.11 | 0.37±0.11 | 0.34±0.12 | 0.30±0.10 |
| SS_BLUP | 0.56±0.10 | 0.52±0.08 | 0.53±0.08 | 0.49±0.09 | 0.53±0.09 |
| SSFISD  | 0.58±0.14 | 0.54±0.08 | 0.54±0.08 | 0.51±0.09 | 0.57±0.08 |
| SSRISD  | 0.50±0.11 | 0.45±0.08 | 0.45±0.08 | 0.43±0.09 | 0.47±0.10 |

1178

1179 **Table S 6: Mean and standard deviation of coincidence index of GS and MAS models.**

| Trait    | FxRRBLUP  | RKHS      | RRBLUP    | SVR       | MAS       |
|----------|-----------|-----------|-----------|-----------|-----------|
| FLT_BLUP | 0.47±0.11 | 0.40±0.11 | 0.42±0.11 | 0.37±0.10 | 0.37±0.09 |
| FTFILD   | 0.49±0.09 | 0.37±0.10 | 0.37±0.10 | 0.35±0.11 | 0.45±0.10 |
| FTFISD   | 0.43±0.16 | 0.44±0.10 | 0.44±0.10 | 0.42±0.09 | 0.30±0.11 |
| FTRILD   | 0.40±0.09 | 0.36±0.10 | 0.35±0.10 | 0.28±0.10 | 0.37±0.10 |
| FTRISD   | 0.45±0.15 | 0.43±0.09 | 0.42±0.10 | 0.42±0.10 | 0.26±0.09 |
| MT_BLUP  | 0.34±0.15 | 0.35±0.09 | 0.36±0.10 | 0.33±0.11 | 0.27±0.10 |
| MFISD    | 0.32±0.12 | 0.30±0.09 | 0.30±0.10 | 0.31±0.09 | 0.26±0.09 |
| MRISD    | 0.31±0.18 | 0.34±0.10 | 0.35±0.10 | 0.33±0.10 | 0.33±0.10 |
| SS_BLUP  | 0.44±0.11 | 0.37±0.11 | 0.36±0.10 | 0.36±0.10 | 0.42±0.11 |
| SSFISD   | 0.48±0.11 | 0.44±0.09 | 0.44±0.09 | 0.43±0.09 | 0.46±0.10 |
| SSRISD   | 0.42±0.11 | 0.36±0.11 | 0.37±0.11 | 0.36±0.10 | 0.40±0.10 |

1180

1181
